# Supplementary material for: A kinetic chemistry tagging technique and its application to modelling the stable isotopic composition of atmospheric trace gases
Source: Copernicus journal article supplement (doi:10.5194/gmd-3-337-2010), 2010-08-10
Supplement: Supplementary file 3 [file gmd-3-337-2010-supplement.zip]

## Supplemental Material:

# The Chemical Mechanism of MECCA

S. Gromov, P. Jöckel, R. Sander and  
C.A.M. Brenninkmeijer

Correspondence to:  
S. Gromov  
Air Chemistry Department  
Max Planck Institute for Chemistry  
PO Box 3060, 55020 Mainz, Germany  
[sergey.gromov@mpic.de](mailto:sergey.gromov@mpic.de)

This document is part of the electronic supplement of the article “A kinetic chemistry tagging technique and its application to modelling the stable isotopic composition of atmospheric trace gases.” in *Geosci. Model Dev.* (2010), available at: <http://www.geosci-model-dev.net>

Date: 08/06/2010



# The Chemical Mechanism of MECCA

KPP version: 2.2.1\_rs3

MECCA version: 2.5

Date: February 2, 2010.

Selected reactions:

“(Tr || St) && G) && !Br && !I && !Hg && !Het”

Number of aerosol phases: 0

Number of species in selected mechanism:

Gas phase: 99

Aqueous phase: 0

All species: 99

Number of reactions in selected mechanism:

Gas phase (Gnn): 406

Aqueous phase (Annn): 0

Henry (Hnnn): 0

Photolysis (Jnnn): 100

Heterogeneous (HETnnn): 0

Equilibria (EQnn): 0

Isotope exchange (IEXann): 7

Dummy (Dnn): 2

All equations: 515

Further information can be found in the article “Technical Note:

The new comprehensive atmospheric chemistry module MECCA” by  
R. Sander et al. (Atmos. Chem. Phys. 5, 445-450, 2005), available at

<http://www.atmos-chem-phys.net/5/445>.



Table 1: Gas phase reactions

| #      | labels | reaction                                                                                                                                        | rate coefficient                                      | reference                                             |
|--------|--------|-------------------------------------------------------------------------------------------------------------------------------------------------|-------------------------------------------------------|-------------------------------------------------------|
| G1000  | StTrG  | $O_2 + O(^1D) \rightarrow O(^3P) + O_2$                                                                                                         | $3.3E-11*EXP(55./temp)$                               | Sander et al. (2006)                                  |
| G1001  | StTrG  | $O_2 + O(^3P) \rightarrow O_3$                                                                                                                  | $6.E-34*((temp/300.)**(-2.4))*cair$                   | Sander et al. (2006)                                  |
| G1002  | StG    | $O_3 + O(^1D) \rightarrow 2 O_2$                                                                                                                | 1.2E-10                                               | Sander et al. (2006)*                                 |
| G1003  | StG    | $O_3 + O(^3P) \rightarrow 2 O_2$                                                                                                                | $8.E-12*EXP(-2060./temp)$                             | Sander et al. (2006)                                  |
| G2100  | StTrG  | $H + O_2 \rightarrow HO_2$                                                                                                                      | $k\_3rd(temp, cair, 4.4E-32, 1.3, 4.7E-11, 0.2, 0.6)$ | Sander et al. (2006)                                  |
| G2101  | StG    | $H + O_3 \rightarrow OH + O_2$                                                                                                                  | $1.4E-10*EXP(-470./temp)$                             | Sander et al. (2006)                                  |
| G2102  | StG    | $H_2 + O(^1D) \rightarrow H + OH$                                                                                                               | 1.1E-10                                               | Sander et al. (2006)                                  |
| G2103  | StG    | $OH + O(^3P) \rightarrow H + O_2$                                                                                                               | $2.2E-11*EXP(120./temp)$                              | Sander et al. (2006)                                  |
| G2104  | StTrG  | $OH + O_3 \rightarrow HO_2 + O_2$<br>O isotope transfer: $OH \rightarrow 0.5 HO_2$<br>O isotope transfer: $O_3 \rightarrow 0.5 HO_2 + O_2$      | $1.7E-12*EXP(-940./temp)$                             | Sander et al. (2006)                                  |
| G2105  | StTrG  | $OH + H_2 \rightarrow H_2O + H$                                                                                                                 | $2.8E-12*EXP(-1800./temp)$                            | Sander et al. (2006)                                  |
| G2106  | StG    | $HO_2 + O(^3P) \rightarrow OH + O_2$<br>O isotope transfer: $HO_2 \rightarrow OH + 0.5 O_2$<br>O isotope transfer: $O(^3P) \rightarrow 0.5 O_2$ | $3.E-11*EXP(200./temp)$                               | Sander et al. (2006)                                  |
| G2107  | StTrG  | $HO_2 + O_3 \rightarrow OH + 2 O_2$<br>O isotope transfer: $HO_2 \rightarrow OH + 0.25 O_2$<br>O isotope transfer: $O_3 \rightarrow 0.75 O_2$   | $1.E-14*EXP(-490./temp)$                              | Sander et al. (2006)                                  |
| G2108a | StG    | $HO_2 + H \rightarrow 2 OH$                                                                                                                     | 7.2E-11                                               | Sander et al. (2006)                                  |
| G2108b | StG    | $HO_2 + H \rightarrow H_2 + O_2$                                                                                                                | 6.9E-12                                               | Sander et al. (2006)                                  |
| G2108c | StG    | $HO_2 + H \rightarrow O(^3P) + H_2O$                                                                                                            | 1.6E-12                                               | Sander et al. (2006)                                  |
| G2109  | StTrG  | $HO_2 + OH \rightarrow H_2O + O_2$<br>O isotope transfer: $OH \rightarrow H_2O$<br>O isotope transfer: $HO_2 \rightarrow O_2$                   | $4.8E-11*EXP(250./temp)$                              | Sander et al. (2006)                                  |
| G2110  | StTrG  | $HO_2 + HO_2 \rightarrow H_2O_2 + O_2$                                                                                                          | k_HO2_HO2                                             | Christensen et al. (2002), Kircher and Sander (1984)* |
| G2111  | StTrG  | $H_2O + O(^1D) \rightarrow 2 OH$                                                                                                                | $1.63E-10*EXP(60./temp)$                              | Sander et al. (2006)                                  |
| G2112  | StTrG  | $H_2O_2 + OH \rightarrow H_2O + HO_2$<br>O isotope transfer: $OH \rightarrow H_2O$<br>O isotope transfer: $H_2O_2 \rightarrow HO_2$             | 1.8E-12                                               | Sander et al. (2006)                                  |



Table 1: Gas phase reactions (... continued)

| #      | labels | reaction                                                                                                                                                                                                                     | rate coefficient                                                                         | reference             |
|--------|--------|------------------------------------------------------------------------------------------------------------------------------------------------------------------------------------------------------------------------------|------------------------------------------------------------------------------------------|-----------------------|
| G3100  | StGN   | $\text{N} + \text{O}_2 \rightarrow \text{NO} + \text{O}(^3\text{P})$                                                                                                                                                         | $1.5\text{E-}11 \cdot \text{EXP}(-3600./\text{temp})$                                    | Sander et al. (2006)  |
| G3101  | StTrG  | $\text{N}_2 + \text{O}(^1\text{D}) \rightarrow \text{O}(^3\text{P}) + \text{N}_2$                                                                                                                                            | $2.15\text{E-}11 \cdot \text{EXP}(110./\text{temp})$                                     | Sander et al. (2006)  |
| G3102a | StGN   | $\text{N}_2\text{O} + \text{O}(^1\text{D}) \rightarrow 2 \text{NO}$                                                                                                                                                          | $6.7\text{E-}11 \cdot \text{EXP}(20./\text{temp})$                                       | Sander et al. (2006)  |
| G3102b | StGN   | $\text{N}_2\text{O} + \text{O}(^1\text{D}) \rightarrow \text{N}_2 + \text{O}_2$                                                                                                                                              | $4.7\text{E-}11 \cdot \text{EXP}(20./\text{temp})$                                       | Sander et al. (2006)  |
| G3103  | StTrGN | $\text{NO} + \text{O}_3 \rightarrow \text{NO}_2 + \text{O}_2$<br>O isotope transfer: $\text{O}_3 \rightarrow \text{O}_2 + 0.5 \text{NO}_2$<br>O isotope transfer: $\text{NO} \rightarrow 0.5 \text{NO}_2$                    | $3.\text{E-}12 \cdot \text{EXP}(-1500./\text{temp})$                                     | Sander et al. (2006)  |
| G3104  | StGN   | $\text{NO} + \text{N} \rightarrow \text{O}(^3\text{P}) + \text{N}_2$                                                                                                                                                         | $2.1\text{E-}11 \cdot \text{EXP}(100./\text{temp})$                                      | Sander et al. (2006)  |
| G3105  | StGN   | $\text{NO}_2 + \text{O}(^3\text{P}) \rightarrow \text{NO} + \text{O}_2$<br>O isotope transfer: $\text{NO}_2 \rightarrow \text{NO} + 0.5 \text{O}_2$<br>O isotope transfer: $\text{O}(^3\text{P}) \rightarrow 0.5 \text{O}_2$ | $5.1\text{E-}12 \cdot \text{EXP}(210./\text{temp})$                                      | Sander et al. (2006)  |
| G3106  | StTrGN | $\text{NO}_2 + \text{O}_3 \rightarrow \text{NO}_3 + \text{O}_2$<br>O isotope transfer: $\text{NO}_2 \rightarrow 0.667 \text{NO}_3$<br>O isotope transfer: $\text{O}_3 \rightarrow 0.333 \text{NO}_3 + \text{O}_2$            | $1.2\text{E-}13 \cdot \text{EXP}(-2450./\text{temp})$                                    | Sander et al. (2006)  |
| G3107  | StGN   | $\text{NO}_2 + \text{N} \rightarrow \text{N}_2\text{O} + \text{O}(^3\text{P})$                                                                                                                                               | $5.8\text{E-}12 \cdot \text{EXP}(220./\text{temp})$                                      | Sander et al. (2006)  |
| G3108  | StTrGN | $\text{NO}_3 + \text{NO} \rightarrow 2 \text{NO}_2$                                                                                                                                                                          | $1.5\text{E-}11 \cdot \text{EXP}(170./\text{temp})$                                      | Sander et al. (2006)  |
| G3109  | StTrGN | $\text{NO}_3 + \text{NO}_2 \rightarrow \text{N}_2\text{O}_5$                                                                                                                                                                 | k_N03_N02                                                                                | Sander et al. (2006)* |
| G3110  | StTrGN | $\text{N}_2\text{O}_5 \rightarrow \text{NO}_2 + \text{NO}_3$                                                                                                                                                                 | $\text{k\_N03\_N02} / (2.7\text{E-}27 \cdot \text{EXP}(11000./\text{temp}))$             | Sander et al. (2006)* |
| G3200  | TrGN   | $\text{NO} + \text{OH} \rightarrow \text{HONO}$                                                                                                                                                                              | $\text{k\_3rd}(\text{temp}, \text{cair}, 7.0\text{E-}31, 2.6, 3.6\text{E-}11, 0.1, 0.6)$ | Sander et al. (2006)  |
| G3201  | StTrGN | $\text{NO} + \text{HO}_2 \rightarrow \text{NO}_2 + \text{OH}$<br>O isotope transfer: $\text{NO} \rightarrow 0.5 \text{NO}_2$<br>O isotope transfer: $\text{HO}_2 \rightarrow 0.5 \text{NO}_2 + \text{OH}$                    | $3.5\text{E-}12 \cdot \text{EXP}(250./\text{temp})$                                      | Sander et al. (2006)  |
| G3202  | StTrGN | $\text{NO}_2 + \text{OH} \rightarrow \text{HNO}_3$                                                                                                                                                                           | $\text{k\_3rd}(\text{temp}, \text{cair}, 1.8\text{E-}30, 3.0, 2.8\text{E-}11, 0., 0.6)$  | Sander et al. (2006)  |
| G3203  | StTrGN | $\text{NO}_2 + \text{HO}_2 \rightarrow \text{HNO}_4$                                                                                                                                                                         | k_N02_H02                                                                                | Sander et al. (2006)* |
| G3204  | TrGN   | $\text{NO}_3 + \text{HO}_2 \rightarrow \text{NO}_2 + \text{OH} + \text{O}_2$<br>O isotope transfer: $\text{NO}_3 \rightarrow \text{NO}_2 + \text{OH}$<br>O isotope transfer: $\text{HO}_2 \rightarrow \text{O}_2$            | $3.5\text{E-}12$                                                                         | Sander et al. (2006)  |
| G3205  | TrGN   | $\text{HONO} + \text{OH} \rightarrow \text{NO}_2 + \text{H}_2\text{O}$<br>O isotope transfer: $\text{HONO} \rightarrow \text{NO}_2$<br>O isotope transfer: $\text{OH} \rightarrow \text{H}_2\text{O}$                        | $1.8\text{E-}11 \cdot \text{EXP}(-390./\text{temp})$                                     | Sander et al. (2006)  |



Table 1: Gas phase reactions (... continued)

| #      | labels | reaction                                                                                                                                                                                                                                                                                                      | rate coefficient                                                                               | reference                 |
|--------|--------|---------------------------------------------------------------------------------------------------------------------------------------------------------------------------------------------------------------------------------------------------------------------------------------------------------------|------------------------------------------------------------------------------------------------|---------------------------|
| G3206  | StTrGN | $\text{HNO}_3 + \text{OH} \rightarrow \text{H}_2\text{O} + \text{NO}_3$<br>O isotope transfer: $\text{HNO}_3 \rightarrow \text{NO}_3$<br>O isotope transfer: $\text{OH} \rightarrow \text{H}_2\text{O}$                                                                                                       | k_HNO3_OH                                                                                      | Sander et al. (2006)*     |
| G3207  | StTrGN | $\text{HNO}_4 \rightarrow \text{NO}_2 + \text{HO}_2$                                                                                                                                                                                                                                                          | $k_{\text{NO2\_HO2}} / (2.1\text{E-}27 * \text{EXP}(10900./\text{temp}))$                      | Sander et al. (2006)*     |
| G3208  | StTrGN | $\text{HNO}_4 + \text{OH} \rightarrow \text{NO}_2 + \text{H}_2\text{O}$<br>O isotope transfer: $\text{HNO}_4 \rightarrow \text{NO}_2 + \text{O}_2$<br>O isotope transfer: $\text{OH} \rightarrow \text{H}_2\text{O}$                                                                                          | $1.3\text{E-}12 * \text{EXP}(380./\text{temp})$                                                | Sander et al. (2006)      |
| G4100  | StG    | $\text{CH}_4 + \text{O}(^1\text{D}) \rightarrow 0.75 \text{CH}_3\text{O}_2 + 0.75 \text{OH} + 0.25 \text{HCHO} + 0.4 \text{H} + 0.05 \text{H}_2$<br>O isotope transfer: $\text{O}_2 \rightarrow \text{CH}_3\text{O}_2$<br>O isotope transfer: $\text{O}(^1\text{D}) \rightarrow \text{OH} + \text{HCHO}$      | $1.5\text{E-}10$                                                                               | Sander et al. (2006)      |
| G4101  | StTrG  | $\text{CH}_4 + \text{OH} \rightarrow \text{CH}_3\text{O}_2 + \text{H}_2\text{O}$<br>O isotope transfer: $\text{O}_2 \rightarrow \text{CH}_3\text{O}_2$<br>O isotope transfer: $\text{OH} \rightarrow \text{H}_2\text{O}$                                                                                      | $1.85\text{E-}20 * \text{EXP}(2.82 * \log(\text{temp}) - 987./\text{temp})$                    | Atkinson (2003)*          |
| G4102  | TrG    | $\text{CH}_3\text{OH} + \text{OH} \rightarrow \text{HCHO} + \text{HO}_2$                                                                                                                                                                                                                                      | $2.9\text{E-}12 * \text{EXP}(-345./\text{temp})$                                               | Sander et al. (2006)      |
| G4103  | StTrG  | $\text{CH}_3\text{O}_2 + \text{HO}_2 \rightarrow \text{CH}_3\text{OOH} + \text{O}_2$                                                                                                                                                                                                                          | $4.1\text{E-}13 * \text{EXP}(750./\text{temp})$                                                | Sander et al. (2006)*     |
| G4104  | StTrGN | $\text{CH}_3\text{O}_2 + \text{NO} \rightarrow \text{HCHO} + \text{NO}_2 + \text{HO}_2$<br>O isotope transfer: $\text{CH}_3\text{O}_2 \rightarrow 0.5 \text{NO}_2 + \text{HCHO}$<br>O isotope transfer: $\text{NO} \rightarrow 0.5 \text{NO}_2$<br>O isotope transfer: $\text{O}_2 \rightarrow \text{HO}_2$   | $2.8\text{E-}12 * \text{EXP}(300./\text{temp})$                                                | Sander et al. (2006)      |
| G4105  | TrGN   | $\text{CH}_3\text{O}_2 + \text{NO}_3 \rightarrow \text{HCHO} + \text{HO}_2 + \text{NO}_2$<br>O isotope transfer: $\text{CH}_3\text{O}_2 \rightarrow 0.5 \text{NO}_2 + \text{HCHO}$<br>O isotope transfer: $\text{NO}_3 \rightarrow 0.5 \text{NO}_2 + \text{HO}_2$                                             | $1.3\text{E-}12$                                                                               | Atkinson et al. (1999)    |
| G4106a | StTrG  | $\text{CH}_3\text{O}_2 + \text{CH}_3\text{O}_2 \rightarrow 2 \text{HCHO} + 2 \text{HO}_2$                                                                                                                                                                                                                     | $9.5\text{E-}14 * \text{EXP}(390./\text{temp}) / (1.+1./26.2 * \text{EXP}(1130./\text{temp}))$ | Sander et al. (2006)      |
| G4106b | StTrG  | $\text{CH}_3\text{O}_2 + \text{CH}_3\text{O}_2 \rightarrow \text{HCHO} + \text{CH}_3\text{OH} + \text{O}_2$                                                                                                                                                                                                   | $9.5\text{E-}14 * \text{EXP}(390./\text{temp}) / (1.+26.2 * \text{EXP}(-1130./\text{temp}))$   | Sander et al. (2006)      |
| G4107  | StTrG  | $\text{CH}_3\text{OOH} + \text{OH} \rightarrow 0.7 \text{CH}_3\text{O}_2 + 0.3 \text{HCHO} + 0.3 \text{OH} + \text{H}_2\text{O}$<br>O isotope transfer: $\text{CH}_3\text{OOH} \rightarrow \text{CH}_3\text{O}_2 + \text{HCHO} + \text{OH}$<br>O isotope transfer: $\text{OH} \rightarrow \text{H}_2\text{O}$ | k_CH3OOH_OH                                                                                    | Sander et al. (2006)*     |
| G4108  | StTrG  | $\text{HCHO} + \text{OH} \rightarrow \text{CO} + \text{H}_2\text{O} + \text{HO}_2$                                                                                                                                                                                                                            | $9.52\text{E-}18 * \text{EXP}(2.03 * \log(\text{temp}) + 636./\text{temp})$                    | Sivakumaran et al. (2003) |



Table 1: Gas phase reactions (... continued)

| #     | labels | reaction                                                                                                                                                     | rate coefficient                                                                          | reference              |
|-------|--------|--------------------------------------------------------------------------------------------------------------------------------------------------------------|-------------------------------------------------------------------------------------------|------------------------|
|       |        | O isotope transfer: $\text{HCHO} \rightarrow \text{CO}$                                                                                                      |                                                                                           |                        |
|       |        | O isotope transfer: $\text{OH} \rightarrow \text{H}_2\text{O}$                                                                                               |                                                                                           |                        |
|       |        | O isotope transfer: $\text{O}_2 \rightarrow \text{HO}_2$                                                                                                     |                                                                                           |                        |
| G4109 | TrGN   | $\text{HCHO} + \text{NO}_3 \rightarrow \text{HNO}_3 + \text{CO} + \text{HO}_2$                                                                               | $3.4\text{E-}13 \cdot \text{EXP}(-1900./\text{temp})$                                     | Sander et al. (2006)*  |
| G4110 | StTrG  | $\text{CO} + \text{OH} \rightarrow \text{H} + \text{CO}_2$                                                                                                   | $1.57\text{E-}13 + \text{cair} \cdot 3.54\text{E-}33$                                     | McCabe et al. (2001)   |
| G4111 | TrG    | $\text{HCOOH} + \text{OH} \rightarrow \text{HO}_2$                                                                                                           | $4.0\text{E-}13$                                                                          | Sander et al. (2006)   |
| G4200 | TrGC   | $\text{C}_2\text{H}_6 + \text{OH} \rightarrow \text{C}_2\text{H}_5\text{O}_2 + \text{H}_2\text{O}$                                                           | $1.49\text{E-}17 \cdot \text{temp} \cdot \text{temp} \cdot \text{EXP}(-499./\text{temp})$ | Atkinson (2003)        |
|       |        | O isotope transfer: $\text{OH} \rightarrow \text{H}_2\text{O}$                                                                                               |                                                                                           |                        |
|       |        | O isotope transfer: $\text{O}_2 \rightarrow \text{C}_2\text{H}_5\text{O}_2$                                                                                  |                                                                                           |                        |
| G4201 | TrGC   | $\text{C}_2\text{H}_4 + \text{O}_3 \rightarrow \text{HCHO} + 0.22 \text{HO}_2 + 0.12 \text{OH} + 0.23 \text{CO} + 0.54 \text{HCOOH} + 0.1 \text{H}_2$        | $1.2\text{E-}14 \cdot \text{EXP}(-2630./\text{temp})$                                     | Sander et al. (2006)*  |
|       |        | O isotope transfer: $\text{O}_3 \rightarrow \text{HCHO} + \text{OH} + \text{CO} + 0.5 \text{HCOOH} + \text{CO}_2 + 0.5 \text{H}_2\text{O}_2$                 |                                                                                           |                        |
|       |        | O isotope transfer: $\text{O}_2 \rightarrow \text{HO}_2$                                                                                                     |                                                                                           |                        |
|       |        | O isotope transfer: $\text{H}_2\text{O} \rightarrow 0.5 \text{HCOOH} + 0.5 \text{H}_2\text{O}_2$                                                             |                                                                                           |                        |
| G4202 | TrGC   | $\text{C}_2\text{H}_4 + \text{OH} \rightarrow 0.6666667 \text{CH}_3\text{CH}(\text{O}_2)\text{CH}_2\text{OH}$                                                | $k.3\text{rd}(\text{temp}, \text{cair}, 1.0\text{E-}28, 4.5, 8.8\text{E-}12, 0.85, 0.6)$  | Sander et al. (2006)   |
|       |        | O isotope transfer: $\text{O}_2 \rightarrow \text{CH}_3\text{CH}(\text{O}_2)\text{CH}_2\text{OH}$                                                            |                                                                                           |                        |
| G4203 | TrGC   | $\text{C}_2\text{H}_5\text{O}_2 + \text{HO}_2 \rightarrow \text{C}_2\text{H}_5\text{OOH}$                                                                    | $7.5\text{E-}13 \cdot \text{EXP}(700./\text{temp})$                                       | Sander et al. (2006)   |
|       |        | O isotope transfer: $\text{C}_2\text{H}_5\text{O}_2 \rightarrow \text{C}_2\text{H}_5\text{OOH}$                                                              |                                                                                           |                        |
|       |        | O isotope transfer: $\text{HO}_2 \rightarrow \text{O}_2$                                                                                                     |                                                                                           |                        |
| G4204 | TrGNC  | $\text{C}_2\text{H}_5\text{O}_2 + \text{NO} \rightarrow \text{CH}_3\text{CHO} + \text{HO}_2 + \text{NO}_2$                                                   | $2.6\text{E-}12 \cdot \text{EXP}(365./\text{temp})$                                       | Sander et al. (2006)   |
|       |        | O isotope transfer: $\text{C}_2\text{H}_5\text{O}_2 \rightarrow 0.5 \text{NO}_2 + \text{CH}_3\text{CHO}$                                                     |                                                                                           |                        |
|       |        | O isotope transfer: $\text{NO} \rightarrow 0.5 \text{NO}_2$                                                                                                  |                                                                                           |                        |
|       |        | O isotope transfer: $\text{O}_2 \rightarrow \text{HO}_2$                                                                                                     |                                                                                           |                        |
| G4205 | TrGNC  | $\text{C}_2\text{H}_5\text{O}_2 + \text{NO}_3 \rightarrow \text{CH}_3\text{CHO} + \text{HO}_2 + \text{NO}_2$                                                 | $2.3\text{E-}12$                                                                          | Atkinson et al. (1999) |
|       |        | O isotope transfer: $\text{C}_2\text{H}_5\text{O}_2 \rightarrow \text{CH}_3\text{CHO} + 0.5 \text{O}_2$                                                      |                                                                                           |                        |
|       |        | O isotope transfer: $\text{NO}_3 \rightarrow \text{NO}_2 + 0.5 \text{O}_2$                                                                                   |                                                                                           |                        |
|       |        | O isotope transfer: $\text{O}_2 \rightarrow \text{HO}_2$                                                                                                     |                                                                                           |                        |
| G4206 | TrGC   | $\text{C}_2\text{H}_5\text{O}_2 + \text{CH}_3\text{O}_2 \rightarrow 0.75 \text{HCHO} + \text{HO}_2 + 0.75 \text{CH}_3\text{CHO} + 0.25 \text{CH}_3\text{OH}$ | $1.6\text{E-}13 \cdot \text{EXP}(195./\text{temp})$                                       | see note               |



Table 1: Gas phase reactions (... continued)

| #      | labels | reaction                                                                                                                                   | rate coefficient                                                                        | reference              |
|--------|--------|--------------------------------------------------------------------------------------------------------------------------------------------|-----------------------------------------------------------------------------------------|------------------------|
|        |        | O isotope transfer: $\text{C}_2\text{H}_5\text{O}_2 \rightarrow \text{CH}_3\text{CHO} + 0.5 \text{ O}_2$                                   |                                                                                         |                        |
|        |        | O isotope transfer: $\text{CH}_3\text{O}_2 \rightarrow \text{HCHO} + \text{CH}_3\text{OH} + 0.5 \text{ O}_2$                               |                                                                                         |                        |
|        |        | O isotope transfer: $\text{O}_2 \rightarrow \text{HO}_2$                                                                                   |                                                                                         |                        |
|        |        | C isotope transfer: $\text{C}_2\text{H}_5\text{O}_2 \rightarrow \text{CH}_3\text{CHO}$                                                     |                                                                                         |                        |
|        |        | C isotope transfer: $\text{CH}_3\text{O}_2 \rightarrow \text{HCHO} + \text{CH}_3\text{OH}$                                                 |                                                                                         |                        |
| G4207  | TrGC   | $\text{C}_2\text{H}_5\text{OOH} + \text{OH} \rightarrow 0.3 \text{ C}_2\text{H}_5\text{O}_2 + 0.7 \text{ CH}_3\text{CHO} + 0.7 \text{ OH}$ | $k_{\text{CH300H\_OH}}$                                                                 | see note               |
|        |        | O isotope transfer: $\text{C}_2\text{H}_5\text{OOH} \rightarrow \text{C}_2\text{H}_5\text{O}_2 + \text{CH}_3\text{CHO} + \text{OH}$        |                                                                                         |                        |
|        |        | O isotope transfer: $\text{OH} \rightarrow \text{H}_2\text{O}$                                                                             |                                                                                         |                        |
| G4208  | TrGC   | $\text{CH}_3\text{CHO} + \text{OH} \rightarrow \text{CH}_3\text{C(O)OO} + \text{H}_2\text{O}$                                              | $4.4\text{E-}12*\text{EXP}(365./\text{temp})$                                           | Atkinson et al. (2006) |
|        |        | O isotope transfer: $\text{OH} \rightarrow \text{H}_2\text{O}$                                                                             |                                                                                         |                        |
|        |        | O isotope transfer: $\text{CH}_3\text{CHO} \rightarrow 0.333 \text{ CH}_3\text{C(O)OO}$                                                    |                                                                                         |                        |
|        |        | O isotope transfer: $\text{O}_2 \rightarrow 0.667 \text{ CH}_3\text{C(O)OO}$                                                               |                                                                                         |                        |
| G4209  | TrGNC  | $\text{CH}_3\text{CHO} + \text{NO}_3 \rightarrow \text{CH}_3\text{C(O)OO} + \text{HNO}_3$                                                  | $1.4\text{E-}12*\text{EXP}(-1900./\text{temp})$                                         | Sander et al. (2006)   |
|        |        | O isotope transfer: $\text{NO}_3 \rightarrow \text{HNO}_3$                                                                                 |                                                                                         |                        |
|        |        | O isotope transfer: $\text{CH}_3\text{CHO} \rightarrow 0.333 \text{ CH}_3\text{C(O)OO}$                                                    |                                                                                         |                        |
|        |        | O isotope transfer: $\text{O}_2 \rightarrow 0.667 \text{ CH}_3\text{C(O)OO}$                                                               |                                                                                         |                        |
| G4210  | TrGC   | $\text{CH}_3\text{COOH} + \text{OH} \rightarrow \text{CH}_3\text{O}_2 + \text{CO}_2 + \text{H}_2\text{O}$                                  | $4.2\text{E-}14*\text{EXP}(855./\text{temp})$                                           | Atkinson et al. (2006) |
|        |        | O isotope transfer: $\text{CH}_3\text{COOH} \rightarrow \text{CO}_2$                                                                       |                                                                                         |                        |
|        |        | O isotope transfer: $\text{OH} \rightarrow \text{H}_2\text{O}$                                                                             |                                                                                         |                        |
|        |        | O isotope transfer: $\text{O}_2 \rightarrow \text{CH}_3\text{O}_2$                                                                         |                                                                                         |                        |
| G4211a | TrGC   | $\text{CH}_3\text{C(O)OO} + \text{HO}_2 \rightarrow \text{CH}_3\text{C(O)OOH}$                                                             | $4.3\text{E-}13*\text{EXP}(1040./\text{temp})/(1.+1./37.*\text{EXP}(660./\text{temp}))$ | Tyndall et al. (2001)  |
|        |        | O isotope transfer: $\text{CH}_3\text{C(O)OO} \rightarrow \text{CH}_3\text{C(O)OOH}$                                                       |                                                                                         |                        |
|        |        | O isotope transfer: $\text{HO}_2 \rightarrow \text{O}_2$                                                                                   |                                                                                         |                        |
| G4211b | TrGC   | $\text{CH}_3\text{C(O)OO} + \text{HO}_2 \rightarrow \text{CH}_3\text{COOH} + \text{O}_3$                                                   | $4.3\text{E-}13*\text{EXP}(1040./\text{temp})/(1.+37.*\text{EXP}(-660./\text{temp}))$   | Tyndall et al. (2001)  |
|        |        | O isotope transfer: $\text{HO}_2 \rightarrow 0.667 \text{ O}_3$                                                                            |                                                                                         |                        |
|        |        | O isotope transfer: $\text{CH}_3\text{C(O)OO} \rightarrow 0.333 \text{ O}_3 + \text{CH}_3\text{COOH}$                                      |                                                                                         |                        |
| G4212  | TrGNC  | $\text{CH}_3\text{C(O)OO} + \text{NO} \rightarrow \text{CH}_3\text{O}_2 + \text{NO}_2$                                                     | $8.1\text{E-}12*\text{EXP}(270./\text{temp})$                                           | Tyndall et al. (2001)  |
|        |        | O isotope transfer: $\text{CH}_3\text{C(O)OO} \rightarrow 0.5 \text{ NO}_2 + \text{CO}_2$                                                  |                                                                                         |                        |
|        |        | O isotope transfer: $\text{NO} \rightarrow 0.5 \text{ NO}_2$                                                                               |                                                                                         |                        |



Table 1: Gas phase reactions (... continued)

| #      | labels | reaction                                                                                                                                             | rate coefficient            | reference                        |
|--------|--------|------------------------------------------------------------------------------------------------------------------------------------------------------|-----------------------------|----------------------------------|
| G4213  | TrGNC  | O isotope transfer: $\text{O}_2 \rightarrow \text{CH}_3\text{O}_2$                                                                                   |                             |                                  |
|        |        | $\text{CH}_3\text{C}(\text{O})\text{OO} + \text{NO}_2 \rightarrow \text{PAN}$                                                                        | $k_{\text{PA\_NO2}}$        | Sander et al. (2006)             |
| G4214  | TrGNC  | $\text{CH}_3\text{C}(\text{O})\text{OO} + \text{NO}_3 \rightarrow \text{CH}_3\text{O}_2 + \text{NO}_2$                                               | $4.E-12$                    | Canosa-Mas et al. (1996)         |
| G4215a | TrGC   | O isotope transfer: $\text{CH}_3\text{C}(\text{O})\text{OO} \rightarrow \text{CO}_2 + 0.5 \text{ O}_2$                                               |                             |                                  |
|        |        | O isotope transfer: $\text{NO}_3 \rightarrow \text{NO}_2 + 0.5 \text{ O}_2$                                                                          |                             |                                  |
|        |        | O isotope transfer: $\text{O}_2 \rightarrow \text{CH}_3\text{O}_2$                                                                                   |                             |                                  |
|        |        | $\text{CH}_3\text{C}(\text{O})\text{OO} + \text{CH}_3\text{O}_2 \rightarrow \text{HCHO} + \text{HO}_2 + \text{CH}_3\text{O}_2 + \text{CO}_2$         | $0.9*2.E-12*EXP(500./temp)$ | Sander et al. (2006)             |
|        |        | O isotope transfer: $\text{CH}_3\text{C}(\text{O})\text{OO} \rightarrow \text{CO}_2$                                                                 |                             |                                  |
|        |        | O isotope transfer: $\text{CH}_3\text{O}_2 \rightarrow \text{HCHO}$                                                                                  |                             |                                  |
|        |        | O isotope transfer: $\text{O}_2 \rightarrow \text{CH}_3\text{O}_2 + \text{HO}_2$                                                                     |                             |                                  |
| G4215b | TrGC   | C isotope transfer: $\text{CH}_3\text{C}(\text{O})\text{OO} \rightarrow \text{CH}_3\text{O}_2 + \text{CO}_2$                                         |                             |                                  |
|        |        | C isotope transfer: $\text{CH}_3\text{O}_2 \rightarrow \text{HCHO}$                                                                                  |                             |                                  |
|        |        | $\text{CH}_3\text{C}(\text{O})\text{OO} + \text{CH}_3\text{O}_2 \rightarrow \text{CH}_3\text{COOH} + \text{HCHO}$                                    | $0.1*2.E-12*EXP(500./temp)$ | Sander et al. (2006)             |
|        |        | O isotope transfer: $\text{CH}_3\text{C}(\text{O})\text{OO} \rightarrow \text{CH}_3\text{COOH}$                                                      |                             |                                  |
|        |        | O isotope transfer: $\text{CH}_3\text{O}_2 \rightarrow \text{HCHO}$                                                                                  |                             |                                  |
| G4216  | TrGC   | C isotope transfer: $\text{CH}_3\text{C}(\text{O})\text{OO} \rightarrow \text{CH}_3\text{COOH}$                                                      |                             |                                  |
|        |        | C isotope transfer: $\text{CH}_3\text{O}_2 \rightarrow \text{HCHO}$                                                                                  |                             |                                  |
|        |        | $\text{CH}_3\text{C}(\text{O})\text{OO} + \text{C}_2\text{H}_5\text{O}_2 \rightarrow 0.82 \text{ CH}_3\text{O}_2 + \text{CH}_3\text{CHO} + 0.82$     | $4.9E-12*EXP(211./temp)$    | Atkinson et al. (1999), Kirchner |
|        |        | $\text{HO}_2 + 0.18 \text{ CH}_3\text{COOH}$                                                                                                         |                             | and Stockwell (1996)*            |
|        |        | O isotope transfer: $\text{CH}_3\text{C}(\text{O})\text{OO} \rightarrow \text{CH}_3\text{COOH} + \text{CH}_3\text{O}_2 +$                            |                             |                                  |
|        |        | $0.5 \text{ CO}_2$                                                                                                                                   |                             |                                  |
|        |        | O isotope transfer: $\text{C}_2\text{H}_5\text{O}_2 \rightarrow \text{CH}_3\text{CHO} + 0.5 \text{ CO}_2$                                            |                             |                                  |
| G4217  | TrGC   | O isotope transfer: $\text{O}_2 \rightarrow \text{HO}_2$                                                                                             |                             |                                  |
|        |        | C isotope transfer: $\text{CH}_3\text{C}(\text{O})\text{OO} \rightarrow \text{CH}_3\text{COOH} + \text{CH}_3\text{O}_2 +$                            |                             |                                  |
|        |        | $\text{CO}_2$                                                                                                                                        |                             |                                  |
| G4218  | TrGC   | C isotope transfer: $\text{C}_2\text{H}_5\text{O}_2 \rightarrow \text{CH}_3\text{CHO}$                                                               |                             |                                  |
|        |        | $\text{CH}_3\text{C}(\text{O})\text{OO} + \text{CH}_3\text{C}(\text{O})\text{OO} \rightarrow 2 \text{ CH}_3\text{O}_2 + 2 \text{ CO}_2 + \text{O}_2$ | $2.5E-12*EXP(500./temp)$    | Tyndall et al. (2001)            |
| G4219  | TrGNC  | $\text{CH}_3\text{C}(\text{O})\text{OOH} + \text{OH} \rightarrow \text{CH}_3\text{C}(\text{O})\text{OO}$                                             | $k_{\text{CH300H\_OH}}$     | see note                         |
|        |        | O isotope transfer: $\text{CH}_3\text{C}(\text{O})\text{OOH} \rightarrow \text{CH}_3\text{C}(\text{O})\text{OO}$                                     |                             |                                  |
|        |        | O isotope transfer: $\text{OH} \rightarrow \text{H}_2\text{O}$                                                                                       |                             |                                  |
| G4219  | TrGNC  | $\text{NACA} + \text{OH} \rightarrow \text{NO}_2 + \text{HCHO} + \text{CO}$                                                                          | $5.6E-12*EXP(270./temp)$    | see note                         |



Table 1: Gas phase reactions (... continued)

| #     | labels | reaction                                                                                                                                                                                                                                                                                                                                                                          | rate coefficient                                                                      | reference               |
|-------|--------|-----------------------------------------------------------------------------------------------------------------------------------------------------------------------------------------------------------------------------------------------------------------------------------------------------------------------------------------------------------------------------------|---------------------------------------------------------------------------------------|-------------------------|
|       |        | O isotope transfer: $\text{NACA} \rightarrow \text{NO}_2 + \text{HCHO} + \text{CO}$                                                                                                                                                                                                                                                                                               |                                                                                       |                         |
|       |        | O isotope transfer: $\text{OH} \rightarrow \text{H}_2\text{O}$                                                                                                                                                                                                                                                                                                                    |                                                                                       |                         |
| G4220 | TrGNC  | $\text{PAN} + \text{OH} \rightarrow \text{HCHO} + \text{NO}_2$                                                                                                                                                                                                                                                                                                                    | 2.E-14                                                                                | see note                |
|       |        | O isotope transfer: $\text{PAN} \rightarrow \text{HCHO} + \text{NO}_2 + \text{CO}$                                                                                                                                                                                                                                                                                                |                                                                                       |                         |
|       |        | O isotope transfer: $\text{OH} \rightarrow \text{H}_2\text{O}$                                                                                                                                                                                                                                                                                                                    |                                                                                       |                         |
| G4221 | TrGNC  | $\text{PAN} \rightarrow \text{CH}_3\text{C}(\text{O})\text{OO} + \text{NO}_2$                                                                                                                                                                                                                                                                                                     | k_PAN_M                                                                               | Sander et al. (2006)*   |
| G4300 | TrGC   | $\text{C}_3\text{H}_8 + \text{OH} \rightarrow 0.82 \text{ C}_3\text{H}_7\text{O}_2 + 0.18 \text{ C}_2\text{H}_5\text{O}_2 + \text{H}_2\text{O}$                                                                                                                                                                                                                                   | $1.65\text{E-}17*\text{temp}*\text{temp}*\text{EXP}(-87./\text{temp})$                | Atkinson (2003)         |
|       |        | O isotope transfer: $\text{OH} \rightarrow \text{H}_2\text{O}$                                                                                                                                                                                                                                                                                                                    |                                                                                       |                         |
|       |        | O isotope transfer: $\text{O}_2 \rightarrow \text{C}_3\text{H}_7\text{O}_2 + \text{C}_2\text{H}_5\text{O}_2$                                                                                                                                                                                                                                                                      |                                                                                       |                         |
| G4301 | TrGC   | $\text{C}_3\text{H}_6 + \text{O}_3 \rightarrow 0.57 \text{ HCHO} + 0.47 \text{ CH}_3\text{CHO} + 0.33 \text{ OH} + 0.26 \text{ HO}_2 + 0.07 \text{ CH}_3\text{O}_2 + 0.06 \text{ C}_2\text{H}_5\text{O}_2 + 0.23 \text{ CH}_3\text{C}(\text{O})\text{OO} + 0.04 \text{ CH}_3\text{COCHO} + 0.06 \text{ CH}_4 + 0.31 \text{ CO} + 0.22 \text{ HCOOH} + 0.03 \text{ CH}_3\text{OH}$ | $6.5\text{E-}15*\text{EXP}(-1900./\text{temp})$                                       | Sander et al. (2006)*   |
|       |        | O isotope transfer: $\text{O}_3 \rightarrow \text{HCHO} + \text{CH}_3\text{CHO} + \text{OH} + 0.5 \text{ C}_2\text{H}_5\text{O}_2 + 0.333 \text{ CH}_3\text{C}(\text{O})\text{OO} + 0.5 \text{ CH}_3\text{COCHO} + \text{CO} + 0.5 \text{ HCOOH}$                                                                                                                                 |                                                                                       |                         |
|       |        | O isotope transfer: $\text{O}_2 \rightarrow \text{HO}_2 + 0.5 \text{ C}_2\text{H}_5\text{O}_2 + 0.667 \text{ CH}_3\text{C}(\text{O})\text{OO} + 0.5 \text{ CH}_3\text{COCHO} + \text{CH}_3\text{O}_2 + \text{CH}_3\text{OH}$                                                                                                                                                      |                                                                                       |                         |
|       |        | O isotope transfer: $\text{H}_2\text{O} \rightarrow 0.5 \text{ HCOOH}$                                                                                                                                                                                                                                                                                                            |                                                                                       |                         |
| G4302 | TrGC   | $\text{C}_3\text{H}_6 + \text{OH} \rightarrow \text{CH}_3\text{CH}(\text{O}_2)\text{CH}_2\text{OH}$                                                                                                                                                                                                                                                                               | $\text{k\_3rd}(\text{temp}, \text{cair}, 8.\text{E-}27, 3.5, 3.\text{E-}11, 0., 0.5)$ | Atkinson et al. (1999)  |
|       |        | O isotope transfer: $\text{O}_2 \rightarrow \text{CH}_3\text{CH}(\text{O}_2)\text{CH}_2\text{OH}$                                                                                                                                                                                                                                                                                 |                                                                                       |                         |
| G4303 | TrGNC  | $\text{C}_3\text{H}_6 + \text{NO}_3 \rightarrow \text{ONIT}$                                                                                                                                                                                                                                                                                                                      | $4.6\text{E-}13*\text{EXP}(-1155./\text{temp})$                                       | Atkinson et al. (1999)  |
| G4304 | TrGC   | $\text{C}_3\text{H}_7\text{O}_2 + \text{HO}_2 \rightarrow \text{C}_3\text{H}_7\text{OOH}$                                                                                                                                                                                                                                                                                         | k_Pr02_H02                                                                            | Atkinson (1997)*        |
|       |        | O isotope transfer: $\text{C}_3\text{H}_7\text{O}_2 \rightarrow \text{C}_3\text{H}_7\text{OOH}$                                                                                                                                                                                                                                                                                   |                                                                                       |                         |
|       |        | O isotope transfer: $\text{HO}_2 \rightarrow \text{O}_2$                                                                                                                                                                                                                                                                                                                          |                                                                                       |                         |
| G4305 | TrGNC  | $\text{C}_3\text{H}_7\text{O}_2 + \text{NO} \rightarrow 0.96 \text{ CH}_3\text{COCH}_3 + 0.96 \text{ HO}_2 + 0.96 \text{ NO}_2 + 0.04 \text{ C}_3\text{H}_7\text{ONO}_2$                                                                                                                                                                                                          | k_Pr02_N0                                                                             | Atkinson et al. (1999)* |
|       |        | O isotope transfer: $\text{C}_3\text{H}_7\text{O}_2 \rightarrow 0.5 \text{ NO}_2 + \text{C}_3\text{H}_7\text{ONO}_2 + \text{CH}_3\text{COCH}_3$                                                                                                                                                                                                                                   |                                                                                       |                         |
|       |        | O isotope transfer: $\text{NO} \rightarrow 0.5 \text{ NO}_2$                                                                                                                                                                                                                                                                                                                      |                                                                                       |                         |
|       |        | O isotope transfer: $\text{O}_2 \rightarrow \text{HO}_2$                                                                                                                                                                                                                                                                                                                          |                                                                                       |                         |



Table 1: Gas phase reactions (... continued)

| #     | labels | reaction                                                                                                                                                                                                                                                                                                                                                                                                                                                                                                                                                                                                       | rate coefficient                                                         | reference                     |
|-------|--------|----------------------------------------------------------------------------------------------------------------------------------------------------------------------------------------------------------------------------------------------------------------------------------------------------------------------------------------------------------------------------------------------------------------------------------------------------------------------------------------------------------------------------------------------------------------------------------------------------------------|--------------------------------------------------------------------------|-------------------------------|
| G4306 | TrGC   | $\text{C}_3\text{H}_7\text{O}_2 + \text{CH}_3\text{O}_2 \rightarrow \text{CH}_3\text{COCH}_3 + 0.8 \text{HCHO} + 0.8 \text{HO}_2 + 0.2 \text{CH}_3\text{OH}$<br>O isotope transfer: $\text{C}_3\text{H}_7\text{O}_2 \rightarrow \text{CH}_3\text{COCH}_3$<br>O isotope transfer: $\text{CH}_3\text{O}_2 \rightarrow \text{HCHO} + \text{CH}_3\text{OH}$<br>O isotope transfer: $\text{O}_2 \rightarrow \text{HO}_2$<br>C isotope transfer: $\text{C}_3\text{H}_7\text{O}_2 \rightarrow \text{CH}_3\text{COCH}_3$<br>C isotope transfer: $\text{CH}_3\text{O}_2 \rightarrow \text{HCHO} + \text{CH}_3\text{OH}$ | k_Pr02_CH302                                                             | Kirchner and Stockwell (1996) |
| G4307 | TrGC   | $\text{C}_3\text{H}_7\text{OOH} + \text{OH} \rightarrow 0.3 \text{C}_3\text{H}_7\text{O}_2 + 0.7 \text{CH}_3\text{COCH}_3 + 0.7 \text{OH}$<br>O isotope transfer: $\text{C}_3\text{H}_7\text{OOH} \rightarrow \text{C}_3\text{H}_7\text{O}_2 + \text{CH}_3\text{COCH}_3 + \text{OH}$<br>O isotope transfer: $\text{OH} \rightarrow \text{H}_2\text{O}$                                                                                                                                                                                                                                                         | k_CH300H_OH                                                              | see note                      |
| G4308 | TrGC   | $\text{CH}_3\text{CH}(\text{O}_2)\text{CH}_2\text{OH} + \text{HO}_2 \rightarrow \text{CH}_3\text{CH}(\text{OOH})\text{CH}_2\text{OH}$<br>O isotope transfer: $\text{CH}_3\text{CH}(\text{O}_2)\text{CH}_2\text{OH} \rightarrow \text{CH}_3\text{CH}(\text{OOH})\text{CH}_2\text{OH}$<br>O isotope transfer: $\text{HO}_2 \rightarrow \text{O}_2$                                                                                                                                                                                                                                                               | $6.5\text{E-}13 \cdot \text{EXP}(650./\text{temp})$                      | Müller and Brasseur (1995)    |
| G4309 | TrGNC  | $\text{CH}_3\text{CH}(\text{O}_2)\text{CH}_2\text{OH} + \text{NO} \rightarrow 0.98 \text{CH}_3\text{CHO} + 0.98 \text{HCHO} + 0.98 \text{HO}_2 + 0.98 \text{NO}_2 + 0.02 \text{ONIT}$<br>O isotope transfer: $\text{CH}_3\text{CH}(\text{O}_2)\text{CH}_2\text{OH} \rightarrow 0.5 \text{NO}_2 + \text{CH}_3\text{CHO} + \text{HCHO} + \text{ONIT}$<br>O isotope transfer: $\text{NO} \rightarrow 0.5 \text{NO}_2$<br>O isotope transfer: $\text{O}_2 \rightarrow \text{HO}_2$                                                                                                                                 | $4.2\text{E-}12 \cdot \text{EXP}(180./\text{temp})$                      | Müller and Brasseur (1995)*   |
| G4310 | TrGC   | $\text{CH}_3\text{CH}(\text{OOH})\text{CH}_2\text{OH} + \text{OH} \rightarrow 0.5 \text{CH}_3\text{CH}(\text{O}_2)\text{CH}_2\text{OH} + 0.5 \text{CH}_3\text{COCH}_2\text{OH} + 0.5 \text{OH} + \text{H}_2\text{O}$<br>O isotope transfer: $\text{CH}_3\text{CH}(\text{OOH})\text{CH}_2\text{OH} \rightarrow \text{CH}_3\text{CH}(\text{O}_2)\text{CH}_2\text{OH} + \text{CH}_3\text{COCH}_2\text{OH} + \text{OH}$<br>O isotope transfer: $\text{OH} \rightarrow \text{H}_2\text{O}$                                                                                                                          | $3.8\text{E-}12 \cdot \text{EXP}(200./\text{temp})$                      | Müller and Brasseur (1995)    |
| G4311 | TrGC   | $\text{CH}_3\text{COCH}_3 + \text{OH} \rightarrow \text{CH}_3\text{COCH}_2\text{O}_2 + \text{H}_2\text{O}$<br>O isotope transfer: $\text{CH}_3\text{COCH}_3 \rightarrow 0.333 \text{CH}_3\text{COCH}_2\text{O}_2$<br>O isotope transfer: $\text{O}_2 \rightarrow 0.667 \text{CH}_3\text{COCH}_2\text{O}_2$<br>O isotope transfer: $\text{OH} \rightarrow \text{H}_2\text{O}$                                                                                                                                                                                                                                   | $1.33\text{E-}13 + 3.82\text{E-}11 \cdot \text{EXP}(-2000./\text{temp})$ | Sander et al. (2006)          |
| G4312 | TrGC   | $\text{CH}_3\text{COCH}_2\text{O}_2 + \text{HO}_2 \rightarrow \text{CH}_3\text{COCH}_2\text{O}_2\text{H}$<br>O isotope transfer: $\text{CH}_3\text{COCH}_2\text{O}_2 \rightarrow \text{CH}_3\text{COCH}_2\text{O}_2\text{H}$                                                                                                                                                                                                                                                                                                                                                                                   | $8.6\text{E-}13 \cdot \text{EXP}(700./\text{temp})$                      | Tyndall et al. (2001)         |



Table 1: Gas phase reactions (... continued)

| #     | labels | reaction                                                                                                                                                                                                                                                       | rate coefficient                                     | reference             |
|-------|--------|----------------------------------------------------------------------------------------------------------------------------------------------------------------------------------------------------------------------------------------------------------------|------------------------------------------------------|-----------------------|
| G4313 | TrGNC  | O isotope transfer: $\text{HO}_2 \rightarrow \text{O}_2$                                                                                                                                                                                                       |                                                      |                       |
|       |        | $\text{CH}_3\text{COCH}_2\text{O}_2 + \text{NO} \rightarrow \text{NO}_2 + \text{CH}_3\text{C}(\text{O})\text{OO} + \text{HCHO}$                                                                                                                                | $2.9\text{E-}12 \cdot \text{EXP}(300./\text{temp})$  | Sander et al. (2006)  |
|       |        | O isotope transfer: $\text{CH}_3\text{COCH}_2\text{O}_2 \rightarrow 0.5 \text{ NO}_2 + \text{HCHO} + 0.333 \text{ CH}_3\text{C}(\text{O})\text{OO}$                                                                                                            |                                                      |                       |
|       |        | O isotope transfer: $\text{NO} \rightarrow 0.5 \text{ NO}_2$                                                                                                                                                                                                   |                                                      |                       |
|       |        | O isotope transfer: $\text{O}_2 \rightarrow 0.667 \text{ CH}_3\text{C}(\text{O})\text{OO}$                                                                                                                                                                     |                                                      |                       |
| G4314 | TrGC   | $\text{CH}_3\text{COCH}_2\text{O}_2 + \text{CH}_3\text{O}_2 \rightarrow 0.5 \text{ CH}_3\text{COCHO} + 0.5 \text{ CH}_3\text{OH} + 0.3 \text{ CH}_3\text{C}(\text{O})\text{OO} + 0.8 \text{ HCHO} + 0.3 \text{ HO}_2 + 0.2 \text{ CH}_3\text{COCH}_2\text{OH}$ | $7.5\text{E-}13 \cdot \text{EXP}(500./\text{temp})$  | Tyndall et al. (2001) |
|       |        | O isotope transfer: $\text{CH}_3\text{COCH}_2\text{O}_2 \rightarrow \text{CH}_3\text{COCHO} + 0.333 \text{ CH}_3\text{C}(\text{O})\text{OO} + 0.3 \text{ HCHO} + \text{CH}_3\text{COCH}_2\text{OH}$                                                            |                                                      |                       |
|       |        | O isotope transfer: $\text{CH}_3\text{O}_2 \rightarrow \text{CH}_3\text{OH} + 0.5 \text{ HCHO}$                                                                                                                                                                |                                                      |                       |
|       |        | O isotope transfer: $\text{O}_2 \rightarrow 0.667 \text{ CH}_3\text{C}(\text{O})\text{OO} + \text{HO}_2$                                                                                                                                                       |                                                      |                       |
|       |        | C isotope transfer: $\text{CH}_3\text{COCH}_2\text{O}_2 \rightarrow \text{CH}_3\text{COCHO} + \text{CH}_3\text{C}(\text{O})\text{OO} + \text{HCHO} + \text{CH}_3\text{COCH}_2\text{OH}$                                                                        |                                                      |                       |
|       |        | C isotope transfer: $\text{CH}_3\text{O}_2 \rightarrow \text{CH}_3\text{OH}$                                                                                                                                                                                   |                                                      |                       |
|       |        | $\text{CH}_3\text{COCH}_2\text{O}_2\text{H} + \text{OH} \rightarrow 0.3 \text{ CH}_3\text{COCH}_2\text{O}_2 + 0.7 \text{ CH}_3\text{COCHO} + 0.7 \text{ OH}$                                                                                                   | $k_{\text{CH300H-OH}}$                               |                       |
|       |        | O isotope transfer: $\text{CH}_3\text{COCH}_2\text{O}_2\text{H} \rightarrow \text{CH}_3\text{COCH}_2\text{O}_2 + \text{CH}_3\text{COCHO} + \text{OH}$                                                                                                          |                                                      |                       |
| G4316 | TrGC   | O isotope transfer: $\text{OH} \rightarrow \text{H}_2\text{O}$                                                                                                                                                                                                 |                                                      |                       |
|       |        | $\text{CH}_3\text{COCH}_2\text{OH} + \text{OH} \rightarrow \text{CH}_3\text{COCHO} + \text{HO}_2$                                                                                                                                                              | $2.15\text{E-}12 \cdot \text{EXP}(305./\text{temp})$ | Dillon et al. (2006)  |
|       |        | O isotope transfer: $\text{CH}_3\text{COCH}_2\text{OH} \rightarrow \text{CH}_3\text{COCHO}$                                                                                                                                                                    |                                                      |                       |
|       |        | O isotope transfer: $\text{O}_2 \rightarrow \text{HO}_2$                                                                                                                                                                                                       |                                                      |                       |
|       |        | O isotope transfer: $\text{OH} \rightarrow \text{H}_2\text{O}$                                                                                                                                                                                                 |                                                      |                       |
| G4317 | TrGC   | $\text{CH}_3\text{COCHO} + \text{OH} \rightarrow \text{CH}_3\text{C}(\text{O})\text{OO} + \text{CO}$                                                                                                                                                           | $8.4\text{E-}13 \cdot \text{EXP}(830./\text{temp})$  | Tyndall et al. (1995) |
|       |        | O isotope transfer: $\text{CH}_3\text{COCHO} \rightarrow 0.333 \text{ CH}_3\text{C}(\text{O})\text{OO} + \text{CO}$                                                                                                                                            |                                                      |                       |
|       |        | O isotope transfer: $\text{O}_2 \rightarrow 0.667 \text{ CH}_3\text{C}(\text{O})\text{OO}$                                                                                                                                                                     |                                                      |                       |
|       |        | O isotope transfer: $\text{OH} \rightarrow \text{H}_2\text{O}$                                                                                                                                                                                                 |                                                      |                       |
| G4318 | TrGNC  | $\text{MPAN} + \text{OH} \rightarrow \text{CH}_3\text{COCH}_2\text{OH} + \text{NO}_2$                                                                                                                                                                          | $3.2\text{E-}11$                                     | Orlando et al. (2002) |
|       |        | O isotope transfer: $\text{MPAN} \rightarrow \text{CH}_3\text{COCH}_2\text{OH} + \text{NO}_2$                                                                                                                                                                  |                                                      |                       |
|       |        | O isotope transfer: $\text{OH} \rightarrow \text{H}_2\text{O}$                                                                                                                                                                                                 |                                                      |                       |



Table 1: Gas phase reactions (... continued)

| #     | labels | reaction                                                                                                                                                                                                                                                                                                                                                                                                                                                                                                                                                                                                                                                                                                                                                                                                                                     | rate coefficient                                                                         | reference              |
|-------|--------|----------------------------------------------------------------------------------------------------------------------------------------------------------------------------------------------------------------------------------------------------------------------------------------------------------------------------------------------------------------------------------------------------------------------------------------------------------------------------------------------------------------------------------------------------------------------------------------------------------------------------------------------------------------------------------------------------------------------------------------------------------------------------------------------------------------------------------------------|------------------------------------------------------------------------------------------|------------------------|
| G4319 | TrGNC  | $\text{MPAN} \rightarrow \text{MVKO2} + \text{NO}_2$                                                                                                                                                                                                                                                                                                                                                                                                                                                                                                                                                                                                                                                                                                                                                                                         | $k_{\text{PAN\_M}}$                                                                      | see note               |
| G4320 | TrGNC  | $\text{C}_3\text{H}_7\text{ONO}_2 + \text{OH} \rightarrow \text{CH}_3\text{COCH}_3 + \text{NO}_2$<br>O isotope transfer: $\text{C}_3\text{H}_7\text{ONO}_2 \rightarrow \text{CH}_3\text{COCH}_3 + \text{NO}_2$<br>O isotope transfer: $\text{OH} \rightarrow \text{H}_2\text{O}$                                                                                                                                                                                                                                                                                                                                                                                                                                                                                                                                                             | $6.2\text{E-}13 \cdot \text{EXP}(-230./\text{temp})$                                     | Atkinson et al. (1999) |
| G4400 | TrGC   | $\text{C}_4\text{H}_{10} + \text{OH} \rightarrow \text{C}_4\text{H}_9\text{O}_2 + \text{H}_2\text{O}$<br>O isotope transfer: $\text{O}_2 \rightarrow \text{C}_4\text{H}_9\text{O}_2$<br>O isotope transfer: $\text{OH} \rightarrow \text{H}_2\text{O}$                                                                                                                                                                                                                                                                                                                                                                                                                                                                                                                                                                                       | $1.81\text{E-}17 \cdot \text{temp} \cdot \text{temp} \cdot \text{EXP}(114./\text{temp})$ | Atkinson (2003)        |
| G4401 | TrGC   | $\text{C}_4\text{H}_9\text{O}_2 + \text{CH}_3\text{O}_2 \rightarrow 0.88 \text{ CH}_3\text{COC}_2\text{H}_5 + 0.68 \text{ HCHO} + 1.23 \text{ HO}_2 + 0.12 \text{ CH}_3\text{CHO} + 0.12 \text{ C}_2\text{H}_5\text{O}_2 + 0.18 \text{ CH}_3\text{OH}$<br>O isotope transfer: $\text{C}_4\text{H}_9\text{O}_2 \rightarrow \text{CH}_3\text{COC}_2\text{H}_5 + \text{CH}_3\text{CHO} + \text{C}_2\text{H}_5\text{O}_2$<br>O isotope transfer: $\text{CH}_3\text{O}_2 \rightarrow \text{HCHO} + \text{CH}_3\text{OH}$<br>O isotope transfer: $\text{O}_2 \rightarrow \text{HO}_2$<br>C isotope transfer: $\text{C}_4\text{H}_9\text{O}_2 \rightarrow \text{CH}_3\text{COC}_2\text{H}_5 + \text{CH}_3\text{CHO} + \text{C}_2\text{H}_5\text{O}_2$<br>C isotope transfer: $\text{CH}_3\text{O}_2 \rightarrow \text{HCHO} + \text{CH}_3\text{OH}$ | $k_{\text{Pr02\_CH3O2}}$                                                                 | see note               |
| G4402 | TrGC   | $\text{C}_4\text{H}_9\text{O}_2 + \text{HO}_2 \rightarrow \text{C}_4\text{H}_9\text{OOH}$<br>O isotope transfer: $\text{C}_4\text{H}_9\text{O}_2 \rightarrow \text{C}_4\text{H}_9\text{OOH}$<br>O isotope transfer: $\text{HO}_2 \rightarrow \text{O}_2$                                                                                                                                                                                                                                                                                                                                                                                                                                                                                                                                                                                     | $k_{\text{Pr02\_HO2}}$                                                                   | see note               |
| G4403 | TrGNC  | $\text{C}_4\text{H}_9\text{O}_2 + \text{NO} \rightarrow 0.84 \text{ NO}_2 + 0.56 \text{ CH}_3\text{COC}_2\text{H}_5 + 0.56 \text{ HO}_2 + 0.28 \text{ C}_2\text{H}_5\text{O}_2 + 0.84 \text{ CH}_3\text{CHO} + 0.16 \text{ ONIT}$<br>O isotope transfer: $\text{C}_4\text{H}_9\text{O}_2 \rightarrow 0.5 \text{ NO}_2 + \text{CH}_3\text{COC}_2\text{H}_5 + \text{CH}_3\text{CHO} + 0.667 \text{ ONIT}$<br>O isotope transfer: $\text{NO} \rightarrow 0.5 \text{ NO}_2 + 0.333 \text{ ONIT}$<br>O isotope transfer: $\text{O}_2 \rightarrow \text{HO}_2 + \text{C}_2\text{H}_5\text{O}_2$                                                                                                                                                                                                                                                    | $k_{\text{Pr02\_NO}}$                                                                    | see note               |
| G4404 | TrGC   | $\text{C}_4\text{H}_9\text{OOH} + \text{OH} \rightarrow 0.15 \text{ C}_4\text{H}_9\text{O}_2 + 0.85 \text{ CH}_3\text{COC}_2\text{H}_5 + 0.85 \text{ OH} + 0.85 \text{ H}_2\text{O}$<br>O isotope transfer: $\text{C}_4\text{H}_9\text{OOH} \rightarrow \text{C}_4\text{H}_9\text{O}_2 + \text{CH}_3\text{COC}_2\text{H}_5 + \text{OH}$<br>O isotope transfer: $\text{OH} \rightarrow \text{H}_2\text{O}$                                                                                                                                                                                                                                                                                                                                                                                                                                    | $k_{\text{CH300H\_OH}}$                                                                  | see note               |



Table 1: Gas phase reactions (... continued)

| #     | labels | reaction                                                                                                                                                                                                                                                                                                                                                                                                                                                                                                                                                                                        | rate coefficient                                                                                             | reference             |
|-------|--------|-------------------------------------------------------------------------------------------------------------------------------------------------------------------------------------------------------------------------------------------------------------------------------------------------------------------------------------------------------------------------------------------------------------------------------------------------------------------------------------------------------------------------------------------------------------------------------------------------|--------------------------------------------------------------------------------------------------------------|-----------------------|
| G4405 | TrGC   | $\text{MVK} + \text{O}_3 \rightarrow 0.45 \text{ HCOOH} + 0.9 \text{ CH}_3\text{COCHO} + 0.1 \text{ CH}_3\text{C(O)OO} + 0.19 \text{ OH} + 0.22 \text{ CO} + 0.32 \text{ HO}_2$<br>O isotope transfer: $\text{MVK} \rightarrow 0.5 \text{ CH}_3\text{COCHO} + 0.333 \text{ CH}_3\text{C(O)OO}$<br>O isotope transfer: $\text{O}_3 \rightarrow 0.5 \text{ CH}_3\text{COCHO} + 0.5 \text{ HCOOH} + \text{OH} + \text{CO}$<br>O isotope transfer: $\text{O}_2 \rightarrow \text{HO}_2 + 0.667 \text{ CH}_3\text{C(O)OO}$<br>O isotope transfer: $\text{H}_2\text{O} \rightarrow 0.5 \text{ HCOOH}$ | $.5 * (1.36\text{E-}15 * \text{EXP}(-2112./\text{temp}) + 7.51\text{E-}16 * \text{EXP}(-1521./\text{temp}))$ | Pöschl et al. (2000)  |
| G4406 | TrGC   | $\text{MVK} + \text{OH} \rightarrow \text{MVKO2}$<br><br>O isotope transfer: $\text{MVK} \rightarrow 0.25 \text{ MVKO2}$<br>O isotope transfer: $\text{OH} \rightarrow 0.25 \text{ MVKO2}$<br>O isotope transfer: $\text{O}_2 \rightarrow 0.5 \text{ MVKO2}$                                                                                                                                                                                                                                                                                                                                    | $.5 * (4.1\text{E-}12 * \text{EXP}(452./\text{temp}) + 1.9\text{E-}11 * \text{EXP}(175./\text{temp}))$       | Pöschl et al. (2000)  |
| G4407 | TrGC   | $\text{MVKO2} + \text{HO}_2 \rightarrow \text{MVKOOH}$<br>O isotope transfer: $\text{MVKO2} \rightarrow \text{MVKOOH}$<br>O isotope transfer: $\text{HO}_2 \rightarrow \text{O}_2$                                                                                                                                                                                                                                                                                                                                                                                                              | $1.82\text{E-}13 * \text{EXP}(1300./\text{temp})$                                                            | Pöschl et al. (2000)  |
| G4408 | TrGNC  | $\text{MVKO2} + \text{NO} \rightarrow \text{NO}_2 + 0.25 \text{ CH}_3\text{C(O)OO} + 0.25 \text{ CH}_3\text{COCH}_2\text{OH} + 0.75 \text{ HCHO} + 0.25 \text{ CO} + 0.75 \text{ HO}_2 + 0.5 \text{ CH}_3\text{COCHO}$<br>O isotope transfer: $\text{MVKO2} \rightarrow 0.5 \text{ NO}_2 + 0.333 \text{ CH}_3\text{C(O)OO} + \text{CH}_3\text{COCH}_2\text{OH} + \text{HCHO} + \text{CO} + \text{CH}_3\text{COCHO}$<br>O isotope transfer: $\text{NO} \rightarrow 0.5 \text{ NO}_2$<br>O isotope transfer: $\text{O}_2 \rightarrow \text{HO}_2 + 0.667 \text{ CH}_3\text{C(O)OO}$               | $2.54\text{E-}12 * \text{EXP}(360./\text{temp})$                                                             | Pöschl et al. (2000)  |
| G4409 | TrGNC  | $\text{MVKO2} + \text{NO}_2 \rightarrow \text{MPAN}$<br><br>O isotope transfer: $\text{MVKO2} \rightarrow 0.8 \text{ MPAN}$<br>O isotope transfer: $\text{NO}_2 \rightarrow 0.2 \text{ MPAN}$                                                                                                                                                                                                                                                                                                                                                                                                   | $.25 * \text{k\_3rd}(\text{temp}, \text{cair}, 9.7\text{E-}29, 5.6, 9.3\text{E-}12, 1.5, 0.6)$               | Pöschl et al. (2000)* |
| G4410 | TrGC   | $\text{MVKO2} + \text{CH}_3\text{O}_2 \rightarrow 0.5 \text{ CH}_3\text{COCHO} + 0.375 \text{ CH}_3\text{COCH}_2\text{OH} + 0.125 \text{ CH}_3\text{C(O)OO} + 1.125 \text{ HCHO} + 0.875 \text{ HO}_2 + 0.125 \text{ CO} + 0.25 \text{ CH}_3\text{OH}$                                                                                                                                                                                                                                                                                                                                          | $2.\text{E-}12$                                                                                              | von Kuhlmann (2001)   |



Table 1: Gas phase reactions (... continued)

| #     | labels | reaction                                                                                                                                                                                                                                                                                                                                                                                                                                                                                                                                                                                                                                                            | rate coefficient                                | reference               |
|-------|--------|---------------------------------------------------------------------------------------------------------------------------------------------------------------------------------------------------------------------------------------------------------------------------------------------------------------------------------------------------------------------------------------------------------------------------------------------------------------------------------------------------------------------------------------------------------------------------------------------------------------------------------------------------------------------|-------------------------------------------------|-------------------------|
|       |        | O isotope transfer: $\text{MVKO2} \rightarrow \text{CH}_3\text{COCHO} + \text{CH}_3\text{COCH}_2\text{OH}$<br>+ 0.333 $\text{CH}_3\text{C(O)OO} + 0.778 \text{HCHO} + \text{CO}$<br>O isotope transfer: $\text{CH}_3\text{O}_2 \rightarrow 0.222 \text{HCHO} + \text{CH}_3\text{OH}$<br>O isotope transfer: $\text{O}_2 \rightarrow 0.667 \text{CH}_3\text{C(O)OO} + \text{HO}_2$<br>C isotope transfer: $\text{MVKO2} \rightarrow \text{CH}_3\text{COCHO} + \text{CH}_3\text{COCH}_2\text{OH}$<br>+ $\text{CH}_3\text{C(O)OO} + 0.778 \text{HCHO} + \text{CO}$<br>C isotope transfer: $\text{CH}_3\text{O}_2 \rightarrow 0.222 \text{HCHO} + \text{CH}_3\text{OH}$ |                                                 |                         |
| G4411 | TrGC   | $\text{MVKO2} + \text{MVKO2} \rightarrow \text{CH}_3\text{COCH}_2\text{OH} + \text{CH}_3\text{COCHO} + 0.5$<br>$\text{CO} + 0.5 \text{HCHO} + \text{HO}_2$                                                                                                                                                                                                                                                                                                                                                                                                                                                                                                          | 2.E-12                                          | Pöschl et al. (2000)    |
| G4412 | TrGC   | $\text{MVKOOH} + \text{OH} \rightarrow \text{MVKO2}$<br>O isotope transfer: $\text{MVKOOH} \rightarrow \text{MVKO2}$<br>O isotope transfer: $\text{OH} \rightarrow \text{H}_2\text{O}$                                                                                                                                                                                                                                                                                                                                                                                                                                                                              | 3.E-11                                          | Pöschl et al. (2000)    |
| G4413 | TrGC   | $\text{CH}_3\text{COC}_2\text{H}_5 + \text{OH} \rightarrow \text{MEKO2}$<br>O isotope transfer: $\text{CH}_3\text{COC}_2\text{H}_5 \rightarrow 0.333 \text{MEKO2}$<br>O isotope transfer: $\text{OH} \rightarrow \text{H}_2\text{O}$<br>O isotope transfer: $\text{O}_2 \rightarrow 0.667 \text{MEKO2}$                                                                                                                                                                                                                                                                                                                                                             | $1.3\text{E-12} * \text{EXP}(-25./\text{temp})$ | Atkinson et al. (1999)  |
| G4414 | TrGC   | $\text{MEKO2} + \text{HO}_2 \rightarrow \text{MEKOOH}$<br>O isotope transfer: $\text{MEKO2} \rightarrow \text{MEKOOH}$<br>O isotope transfer: $\text{HO}_2 \rightarrow \text{O}_2$                                                                                                                                                                                                                                                                                                                                                                                                                                                                                  | k_Pr02_H02                                      | see note                |
| G4415 | TrGNC  | $\text{MEKO2} + \text{NO} \rightarrow 0.985 \text{CH}_3\text{CHO} + 0.985 \text{CH}_3\text{C(O)OO} + 0.985$<br>$\text{NO}_2 + 0.015 \text{ONIT}$<br>O isotope transfer: $\text{MEKO2} \rightarrow 0.5 \text{NO}_2 + \text{CH}_3\text{CHO} + 0.333$<br>$\text{CH}_3\text{C(O)OO} + 0.75 \text{ONIT}$<br>O isotope transfer: $\text{NO} \rightarrow 0.5 \text{NO}_2 + 0.25 \text{ONIT}$<br>O isotope transfer: $\text{O}_2 \rightarrow 0.667 \text{CH}_3\text{C(O)OO}$                                                                                                                                                                                                | k_Pr02_N0                                       | see note                |
| G4416 | TrGC   | $\text{MEKOOH} + \text{OH} \rightarrow 0.8 \text{MeCOCO} + 0.8 \text{OH} + 0.2 \text{MEKO2}$<br>O isotope transfer: $\text{MEKOOH} \rightarrow \text{MeCOCO} + \text{MEKO2} + \text{OH}$<br>O isotope transfer: $\text{OH} \rightarrow \text{H}_2\text{O}$                                                                                                                                                                                                                                                                                                                                                                                                          | k_CH300H_OH                                     | see note                |
| G4417 | TrGNC  | $\text{ONIT} + \text{OH} \rightarrow \text{CH}_3\text{COC}_2\text{H}_5 + \text{NO}_2 + \text{H}_2\text{O}$<br>O isotope transfer: $\text{ONIT} \rightarrow \text{CH}_3\text{COC}_2\text{H}_5 + \text{NO}_2$<br>O isotope transfer: $\text{OH} \rightarrow \text{H}_2\text{O}$                                                                                                                                                                                                                                                                                                                                                                                       | 1.7E-12                                         | Atkinson et al. (1999)* |



Table 1: Gas phase reactions (... continued)

| #      | labels | reaction                                                                                                                                                                                                                                                                                                                                                                                                                                                                                                                                                                                                                                                                                                                                                                         | rate coefficient                                       | reference             |
|--------|--------|----------------------------------------------------------------------------------------------------------------------------------------------------------------------------------------------------------------------------------------------------------------------------------------------------------------------------------------------------------------------------------------------------------------------------------------------------------------------------------------------------------------------------------------------------------------------------------------------------------------------------------------------------------------------------------------------------------------------------------------------------------------------------------|--------------------------------------------------------|-----------------------|
| G4500  | TrGC   | $\text{ISOP} + \text{O}_3 \rightarrow 0.28 \text{ HCOOH} + 0.65 \text{ MVK} + 0.1 \text{ MVKO2} + 0.1$<br>$\text{CH}_3\text{C(O)OO} + 0.14 \text{ CO} + 0.58 \text{ HCHO} + 0.09 \text{ H}_2\text{O}_2 + 0.08$<br>$\text{CH}_3\text{O}_2 + 0.25 \text{ OH} + 0.25 \text{ HO}_2$<br>O isotope transfer: $\text{O}_3 \rightarrow 0.5 \text{ HCOOH} + \text{MVK} + 0.333 \text{ MVKO2}$<br>$+ 0.333 \text{ CH}_3\text{C(O)OO} + \text{CO} + 0.081 \text{ HCHO} + 0.5 \text{ H}_2\text{O}_2 + \text{OH}$<br>O isotope transfer: $\text{O}_2 \rightarrow 0.667 \text{ MVKO2} + 0.667 \text{ CH}_3\text{C(O)OO}$<br>$+ 0.919 \text{ HCHO} + \text{CH}_3\text{O}_2 + \text{HO}_2$<br>O isotope transfer: $\text{H}_2\text{O} \rightarrow 0.5 \text{ HCOOH} + 0.5 \text{ H}_2\text{O}_2$ | $7.86\text{E-}15 \cdot \text{EXP}(-1913./\text{temp})$ | Pöschl et al. (2000)  |
| G4501  | TrGC   | $\text{ISOP} + \text{OH} \rightarrow \text{ISO2}$<br>O isotope transfer: $\text{O}_2 \rightarrow \text{ISO2}$                                                                                                                                                                                                                                                                                                                                                                                                                                                                                                                                                                                                                                                                    | $2.54\text{E-}11 \cdot \text{EXP}(410./\text{temp})$   | Pöschl et al. (2000)  |
| G4502  | TrGNC  | $\text{ISOP} + \text{NO}_3 \rightarrow \text{ISON}$<br>O isotope transfer: $\text{O}_2 \rightarrow 0.4 \text{ ISON}$<br>O isotope transfer: $\text{NO}_3 \rightarrow 0.6 \text{ ISON}$                                                                                                                                                                                                                                                                                                                                                                                                                                                                                                                                                                                           | $3.03\text{E-}12 \cdot \text{EXP}(-446./\text{temp})$  | Pöschl et al. (2000)  |
| G4503  | TrGC   | $\text{ISO2} + \text{HO}_2 \rightarrow \text{ISOOH}$<br>O isotope transfer: $\text{ISO2} \rightarrow \text{ISOOH}$<br>O isotope transfer: $\text{HO}_2 \rightarrow \text{O}_2$                                                                                                                                                                                                                                                                                                                                                                                                                                                                                                                                                                                                   | $2.22\text{E-}13 \cdot \text{EXP}(1300./\text{temp})$  | Boyd et al. (2003)*   |
| G4504a | TrGNC  | $\text{ISO2} + \text{NO} \rightarrow 0.956 \text{ NO}_2 + 0.956 \text{ MVK} + 0.956 \text{ HCHO} + 0.956$<br>$\text{HO}_2 + 0.044 \text{ ISON}$                                                                                                                                                                                                                                                                                                                                                                                                                                                                                                                                                                                                                                  | $2.54\text{E-}12 \cdot \text{EXP}(360./\text{temp})$   | Pöschl et al. (2000)* |
| G4505  | TrGC   | $\text{ISO2} + \text{CH}_3\text{O}_2 \rightarrow 0.5 \text{ MVK} + 1.25 \text{ HCHO} + \text{HO}_2 + 0.25$<br>$\text{CH}_3\text{COCHO} + 0.25 \text{ CH}_3\text{COCH}_2\text{OH} + 0.25 \text{ CH}_3\text{OH}$<br>O isotope transfer: $\text{ISO2} \rightarrow \text{MVK} + 0.8 \text{ HCHO} + \text{CH}_3\text{COCHO}$<br>$+ \text{CH}_3\text{COCH}_2\text{OH}$<br>O isotope transfer: $\text{CH}_3\text{O}_2 \rightarrow 0.2 \text{ HCHO} + \text{CH}_3\text{OH}$<br>O isotope transfer: $\text{O}_2 \rightarrow \text{HO}_2$                                                                                                                                                                                                                                                  | $2.\text{E-}12$                                        | von Kuhlmann (2001)   |
| G4506  | TrGC   | $\text{ISO2} + \text{ISO2} \rightarrow 2 \text{ MVK} + \text{HCHO} + \text{HO}_2$<br>O isotope transfer: $\text{ISO2} \rightarrow \text{MVK} + \text{HCHO}$<br>O isotope transfer: $\text{O}_2 \rightarrow \text{HO}_2$                                                                                                                                                                                                                                                                                                                                                                                                                                                                                                                                                          | $2.\text{E-}12$                                        | Pöschl et al. (2000)  |
| G4507  | TrGC   | $\text{ISOOH} + \text{OH} \rightarrow \text{MVK} + \text{OH}$<br>O isotope transfer: $\text{ISOOH} \rightarrow \text{OH} + \text{MVK}$<br>O isotope transfer: $\text{O}_2 \rightarrow \text{H}_2\text{O}$                                                                                                                                                                                                                                                                                                                                                                                                                                                                                                                                                                        | $1.\text{E-}10$                                        | Pöschl et al. (2000)  |
| G4508  | TrGNC  | $\text{ISON} + \text{OH} \rightarrow \text{CH}_3\text{COCH}_2\text{OH} + \text{NACA}$                                                                                                                                                                                                                                                                                                                                                                                                                                                                                                                                                                                                                                                                                            | $1.3\text{E-}11$                                       | Pöschl et al. (2000)  |



Table 1: Gas phase reactions (... continued)

| #      | labels   | reaction                                                                                                   | rate coefficient                                                                            | reference                                     |
|--------|----------|------------------------------------------------------------------------------------------------------------|---------------------------------------------------------------------------------------------|-----------------------------------------------|
|        |          | O isotope transfer: $\text{ISON} \rightarrow \text{CH}_3\text{COCH}_2\text{OH} + \text{NACA}$              |                                                                                             |                                               |
|        |          | O isotope transfer: $\text{OH} \rightarrow \text{H}_2\text{O}$                                             |                                                                                             |                                               |
| G6100  | StTrGCl  | $\text{Cl} + \text{O}_3 \rightarrow \text{ClO} + \text{O}_2$                                               | $2.8\text{E-}11 \cdot \text{EXP}(-250./\text{temp})$                                        | Atkinson et al. (2007)                        |
| G6101  | StGCl    | $\text{ClO} + \text{O}(^3\text{P}) \rightarrow \text{Cl} + \text{O}_2$                                     | $2.5\text{E-}11 \cdot \text{EXP}(110./\text{temp})$                                         | Atkinson et al. (2007)                        |
| G6102a | StTrGCl  | $\text{ClO} + \text{ClO} \rightarrow \text{Cl}_2 + \text{O}_2$                                             | $1.0\text{E-}12 \cdot \text{EXP}(-1590./\text{temp})$                                       | Atkinson et al. (2007)                        |
| G6102b | StTrGCl  | $\text{ClO} + \text{ClO} \rightarrow 2 \text{Cl} + \text{O}_2$                                             | $3.0\text{E-}11 \cdot \text{EXP}(-2450./\text{temp})$                                       | Atkinson et al. (2007)                        |
| G6102c | StTrGCl  | $\text{ClO} + \text{ClO} \rightarrow \text{Cl} + \text{OClO}$                                              | $3.5\text{E-}13 \cdot \text{EXP}(-1370./\text{temp})$                                       | Atkinson et al. (2007)                        |
| G6102d | StTrGCl  | $\text{ClO} + \text{ClO} \rightarrow \text{Cl}_2\text{O}_2$                                                | k.C10.C10                                                                                   | Atkinson et al. (2007)                        |
| G6103  | StTrGCl  | $\text{Cl}_2\text{O}_2 \rightarrow \text{ClO} + \text{ClO}$                                                | $k.\text{C10.C10}/(9.3\text{E-}28 \cdot \text{EXP}(8835./\text{temp}))$                     | Atkinson et al. (2007), Sander et al. (2006)* |
| G6200  | StGCl    | $\text{Cl} + \text{H}_2 \rightarrow \text{HCl} + \text{H}$                                                 | $3.9\text{E-}11 \cdot \text{EXP}(-2310./\text{temp})$                                       | Atkinson et al. (2007)                        |
| G6201a | StGCl    | $\text{Cl} + \text{HO}_2 \rightarrow \text{HCl} + \text{O}_2$                                              | $4.4\text{E-}11 - 7.5\text{E-}11 \cdot \text{EXP}(-620./\text{temp})$                       | Atkinson et al. (2007)                        |
| G6201b | StGCl    | $\text{Cl} + \text{HO}_2 \rightarrow \text{ClO} + \text{OH}$                                               | $7.5\text{E-}11 \cdot \text{EXP}(-620./\text{temp})$                                        | Atkinson et al. (2007)                        |
| G6202  | StTrGCl  | $\text{Cl} + \text{H}_2\text{O}_2 \rightarrow \text{HCl} + \text{HO}_2$                                    | $1.1\text{E-}11 \cdot \text{EXP}(-980./\text{temp})$                                        | Atkinson et al. (2007)                        |
| G6203  | StGCl    | $\text{ClO} + \text{OH} \rightarrow 0.94 \text{Cl} + 0.94 \text{HO}_2 + 0.06 \text{HCl} + 0.06 \text{O}_2$ | $7.3\text{E-}12 \cdot \text{EXP}(300./\text{temp})$                                         | Atkinson et al. (2007)                        |
| G6204  | StTrGCl  | $\text{ClO} + \text{HO}_2 \rightarrow \text{HOCl}$                                                         | $2.2\text{E-}12 \cdot \text{EXP}(340./\text{temp})$                                         | Atkinson et al. (2007)                        |
| G6205  | StTrGCl  | $\text{HCl} + \text{OH} \rightarrow \text{Cl} + \text{H}_2\text{O}$                                        | $1.7\text{E-}12 \cdot \text{EXP}(-230./\text{temp})$                                        | Atkinson et al. (2007)                        |
| G6206  | StGCl    | $\text{HOCl} + \text{OH} \rightarrow \text{ClO} + \text{H}_2\text{O}$                                      | $3.0\text{E-}12 \cdot \text{EXP}(-500./\text{temp})$                                        | Sander et al. (2006)                          |
| G6300  | StTrGNCl | $\text{ClO} + \text{NO} \rightarrow \text{NO}_2 + \text{Cl}$                                               | $6.2\text{E-}12 \cdot \text{EXP}(295./\text{temp})$                                         | Atkinson et al. (2007)                        |
| G6301  | StTrGNCl | $\text{ClO} + \text{NO}_2 \rightarrow \text{ClNO}_3$                                                       | $k.\text{3rd.iupac}(\text{temp}, \text{cair}, 1.6\text{E-}31, 3.4, 7.\text{E-}11, 0., 0.4)$ | Atkinson et al. (2007)                        |
| G6302  | TrGCl    | $\text{ClNO}_3 \rightarrow \text{ClO} + \text{NO}_2$                                                       | $6.918\text{E-}7 \cdot \text{exp}(-10909./\text{temp}) \cdot \text{cair}$                   | Anderson and Fahey (1990)                     |
| G6303  | StGNCl   | $\text{ClNO}_3 + \text{O}(^3\text{P}) \rightarrow \text{ClO} + \text{NO}_3$                                | $4.5\text{E-}12 \cdot \text{EXP}(-900./\text{temp})$                                        | Atkinson et al. (2007)                        |
| G6304  | StTrGNCl | $\text{ClNO}_3 + \text{Cl} \rightarrow \text{Cl}_2 + \text{NO}_3$                                          | $6.2\text{E-}12 \cdot \text{EXP}(145./\text{temp})$                                         | Atkinson et al. (2007)                        |
| G6400  | StTrGCl  | $\text{Cl} + \text{CH}_4 \rightarrow \text{HCl} + \text{CH}_3\text{O}_2$                                   | $6.6\text{E-}12 \cdot \text{EXP}(-1240./\text{temp})$                                       | Atkinson et al. (2006)                        |
|        |          | O isotope transfer: $\text{O}_2 \rightarrow \text{CH}_3\text{O}_2$                                         |                                                                                             |                                               |
| G6401  | StTrGCl  | $\text{Cl} + \text{HCHO} \rightarrow \text{HCl} + \text{CO} + \text{HO}_2$                                 | $8.1\text{E-}11 \cdot \text{EXP}(-34./\text{temp})$                                         | Atkinson et al. (2006)                        |
|        |          | O isotope transfer: $\text{HCHO} \rightarrow \text{CO}$                                                    |                                                                                             |                                               |
|        |          | O isotope transfer: $\text{O}_2 \rightarrow \text{HO}_2$                                                   |                                                                                             |                                               |
| G6402  | StTrGCl  | $\text{Cl} + \text{CH}_3\text{OOH} \rightarrow \text{HCHO} + \text{HCl} + \text{OH}$                       | $5.9\text{E-}11$                                                                            | Atkinson et al. (2006)*                       |
| G6403  | StTrGCl  | $\text{ClO} + \text{CH}_3\text{O}_2 \rightarrow \text{HO}_2 + \text{Cl} + \text{HCHO}$                     | $3.3\text{E-}12 \cdot \text{EXP}(-115./\text{temp})$                                        | Sander et al. (2006)                          |



Table 1: Gas phase reactions (... continued)

| #                                                                                                    | labels   | reaction                                                                                                                                               | rate coefficient                                                                               | reference               |
|------------------------------------------------------------------------------------------------------|----------|--------------------------------------------------------------------------------------------------------------------------------------------------------|------------------------------------------------------------------------------------------------|-------------------------|
| G6404                                                                                                | StGCl    | $\text{CCl}_4 + \text{O}(^1\text{D}) \rightarrow \text{ClO} + 3 \text{Cl}$                                                                             | $3.3\text{E}-10$                                                                               | Sander et al. (2006)    |
| G6405                                                                                                | StGCl    | $\text{CH}_3\text{Cl} + \text{O}(^1\text{D}) \rightarrow \text{OH} + \text{Cl}$                                                                        | $1.65\text{E}-10$                                                                              | see note                |
| G6406                                                                                                | StGCl    | $\text{CH}_3\text{Cl} + \text{OH} \rightarrow \text{H}_2\text{O} + \text{Cl}$                                                                          | $2.4\text{E}-12*\text{EXP}(-1250./\text{temp})$                                                | Sander et al. (2006)    |
| G6407                                                                                                | StGCCl   | $\text{CH}_3\text{CCl}_3 + \text{O}(^1\text{D}) \rightarrow \text{OH} + 3 \text{Cl}$                                                                   | $3.\text{E}-10$                                                                                | see note                |
| G6408                                                                                                | StTrGCCl | $\text{CH}_3\text{CCl}_3 + \text{OH} \rightarrow \text{H}_2\text{O} + 3 \text{Cl}$                                                                     | $1.64\text{E}-12*\text{EXP}(-1520./\text{temp})$                                               | Sander et al. (2006)    |
| G6409                                                                                                | TrGCCl   | $\text{Cl} + \text{C}_2\text{H}_4 \rightarrow 0.6666667 \text{CH}_3\text{CH}(\text{O}_2)\text{CH}_2\text{OH} + \text{HCl}$                             | $k.3\text{rd.iupac}(\text{temp}, \text{cair}, 1.85\text{E}-29, 3.3, 6.0\text{E}-10, 0.0, 0.4)$ | Atkinson et al. (2006)  |
| O isotope transfer: $\text{O}_2 \rightarrow \text{CH}_3\text{CH}(\text{O}_2)\text{CH}_2\text{OH}$    |          |                                                                                                                                                        |                                                                                                |                         |
| G6410                                                                                                | TrGCCl   | $\text{Cl} + \text{CH}_3\text{CHO} \rightarrow \text{HCl} + \text{CH}_3\text{C}(\text{O})\text{OO}$                                                    | $7.9\text{e}-11$                                                                               | Atkinson et al. (2006)* |
| G6500                                                                                                | StGFCI   | $\text{CF}_2\text{Cl}_2 + \text{O}(^1\text{D}) \rightarrow \text{ClO} + \text{Cl}$                                                                     | $1.4\text{E}-10$                                                                               | Sander et al. (2006)    |
| G6501                                                                                                | StGFCI   | $\text{CFCl}_3 + \text{O}(^1\text{D}) \rightarrow \text{ClO} + 2 \text{Cl}$                                                                            | $2.3\text{E}-10$                                                                               | Sander et al. (2006)    |
| G7405                                                                                                | TrGCCl   | $\text{Br} + \text{CH}_3\text{CHO} \rightarrow \text{HBr} + \text{CH}_3\text{C}(\text{O})\text{OO}$                                                    | $1.8\text{e}-11*\text{EXP}(-460./\text{temp})$                                                 | Atkinson et al. (2006)  |
| O isotope transfer: $\text{O}_2 \rightarrow 0.667 \text{CH}_3\text{C}(\text{O})\text{OO}$            |          |                                                                                                                                                        |                                                                                                |                         |
| O isotope transfer: $\text{CH}_3\text{CHO} \rightarrow 0.333 \text{CH}_3\text{C}(\text{O})\text{OO}$ |          |                                                                                                                                                        |                                                                                                |                         |
| G9200                                                                                                | StTrGS   | $\text{SO}_2 + \text{OH} \rightarrow \text{H}_2\text{SO}_4 + \text{HO}_2$                                                                              | $k.3\text{rd}(\text{temp}, \text{cair}, 3.3\text{E}-31, 4.3, 1.6\text{E}-12, 0., 0.6)$         | Sander et al. (2006)    |
| O isotope transfer: $\text{SO}_2 \rightarrow 0.5 \text{H}_2\text{SO}_4$                              |          |                                                                                                                                                        |                                                                                                |                         |
| O isotope transfer: $\text{OH} \rightarrow 0.25 \text{H}_2\text{SO}_4$                               |          |                                                                                                                                                        |                                                                                                |                         |
| O isotope transfer: $\text{H}_2\text{O} \rightarrow 0.25 \text{H}_2\text{SO}_4$                      |          |                                                                                                                                                        |                                                                                                |                         |
| O isotope transfer: $\text{O}_2 \rightarrow \text{HO}_2$                                             |          |                                                                                                                                                        |                                                                                                |                         |
| G9400a                                                                                               | TrGS     | $\text{DMS} + \text{OH} \rightarrow \text{CH}_3\text{SO}_2 + \text{HCHO}$                                                                              | $1.13\text{E}-11*\text{EXP}(-253./\text{temp})$                                                | Atkinson et al. (2004)* |
| O isotope transfer: $\text{O}_2 \rightarrow \text{CH}_3\text{SO}_2 + \text{HCHO}$                    |          |                                                                                                                                                        |                                                                                                |                         |
| G9400b                                                                                               | TrGS     | $\text{DMS} + \text{OH} \rightarrow \text{DMSO} + \text{HO}_2$                                                                                         | $k.\text{DMS.OH}$                                                                              | Atkinson et al. (2004)* |
| O isotope transfer: $\text{OH} \rightarrow \text{DMSO}$                                              |          |                                                                                                                                                        |                                                                                                |                         |
| O isotope transfer: $\text{O}_2 \rightarrow \text{HO}_2$                                             |          |                                                                                                                                                        |                                                                                                |                         |
| G9401                                                                                                | TrGNS    | $\text{DMS} + \text{NO}_3 \rightarrow \text{CH}_3\text{SO}_2 + \text{HNO}_3 + \text{HCHO}$                                                             | $1.9\text{E}-13*\text{EXP}(520./\text{temp})$                                                  | Atkinson et al. (2004)  |
| O isotope transfer: $\text{NO}_3 \rightarrow \text{HNO}_3$                                           |          |                                                                                                                                                        |                                                                                                |                         |
| O isotope transfer: $\text{O}_2 \rightarrow \text{CH}_3\text{SO}_2 + \text{HCHO}$                    |          |                                                                                                                                                        |                                                                                                |                         |
| G9402                                                                                                | TrGS     | $\text{DMSO} + \text{OH} \rightarrow 0.6 \text{SO}_2 + \text{HCHO} + 0.6 \text{CH}_3\text{O}_2 + 0.4 \text{HO}_2 + 0.4 \text{CH}_3\text{SO}_3\text{H}$ | $1.\text{E}-10$                                                                                | Hynes and Wine (1996)   |
| O isotope transfer: $\text{OH} \rightarrow 0.5 \text{SO}_2 + 0.333 \text{CH}_3\text{SO}_3\text{H}$   |          |                                                                                                                                                        |                                                                                                |                         |
| O isotope transfer: $\text{DMSO} \rightarrow 0.5 \text{SO}_2 + 0.333 \text{CH}_3\text{SO}_3\text{H}$ |          |                                                                                                                                                        |                                                                                                |                         |



Table 1: Gas phase reactions (... continued)

| #     | labels | reaction                                                                                                                              | rate coefficient                                     | reference              |
|-------|--------|---------------------------------------------------------------------------------------------------------------------------------------|------------------------------------------------------|------------------------|
|       |        | O isotope transfer: $\text{O}_2 \rightarrow \text{CH}_3\text{O}_2 + \text{HCHO} + \text{HO}_2 + 0.333 \text{CH}_3\text{SO}_3\text{H}$ |                                                      |                        |
| G9403 | TrGS   | $\text{CH}_3\text{SO}_2 \rightarrow \text{SO}_2 + \text{CH}_3\text{O}_2$                                                              | $1.9\text{E}13 \cdot \text{EXP}(-8661./\text{temp})$ | Barone et al. (1995)   |
|       |        | O isotope transfer: $\text{CH}_3\text{SO}_2 \rightarrow \text{SO}_2$                                                                  |                                                      |                        |
|       |        | O isotope transfer: $\text{O}_2 \rightarrow \text{CH}_3\text{O}_2$                                                                    |                                                      |                        |
| G9404 | TrGS   | $\text{CH}_3\text{SO}_2 + \text{O}_3 \rightarrow \text{CH}_3\text{SO}_3$                                                              | $3.\text{E}-13$                                      | Barone et al. (1995)   |
|       |        | O isotope transfer: $\text{CH}_3\text{SO}_2 \rightarrow 0.667 \text{CH}_3\text{SO}_3$                                                 |                                                      |                        |
|       |        | O isotope transfer: $\text{O}_3 \rightarrow 0.333 \text{CH}_3\text{SO}_3$                                                             |                                                      |                        |
| G9405 | TrGS   | $\text{CH}_3\text{SO}_3 + \text{HO}_2 \rightarrow \text{CH}_3\text{SO}_3\text{H}$                                                     | $5.\text{E}-11$                                      | Barone et al. (1995)   |
|       |        | O isotope transfer: $\text{CH}_3\text{SO}_3 \rightarrow \text{CH}_3\text{SO}_3\text{H}$                                               |                                                      |                        |
| G9600 | TrGSCl | $\text{DMS} + \text{Cl} \rightarrow \text{CH}_3\text{SO}_2 + \text{HCl} + \text{HCHO}$                                                | $3.3\text{E}-10$                                     | Atkinson et al. (2004) |
|       |        | O isotope transfer: $\text{O}_2 \rightarrow \text{CH}_3\text{SO}_2 + \text{HCHO}$                                                     |                                                      |                        |

\*Notes:

Rate coefficients for three-body reactions are defined via the function `k_3rd`( $T, M, k_0^{300}, n, k_{\text{inf}}^{300}, m, f_c$ ). In the code, the temperature  $T$  is called `temp` and the concentration of “air molecules”  $M$  is called `cair`. Using the auxiliary variables  $k_0(T)$ ,  $k_{\text{inf}}(T)$ , and  $k_{\text{ratio}}$ , `k_3rd` is defined as:

$$k_0(T) = k_0^{300} \times \left(\frac{300\text{K}}{T}\right)^n \quad (1)$$

$$k_{\text{inf}}(T) = k_{\text{inf}}^{300} \times \left(\frac{300\text{K}}{T}\right)^m \quad (2)$$

$$k_{\text{ratio}} = \frac{k_0(T)M}{k_{\text{inf}}(T)} \quad (3)$$

$$\text{k\_3rd} = \frac{k_0(T)M}{1 + k_{\text{ratio}}} \times f_c \left( \frac{1}{1 + (\log_{10}(k_{\text{ratio}}))^2} \right) \quad (4)$$

A similar function, called `k_3rd_iupac` here, is used by Atkinson et al. (2005) for three-body reactions. It has the same function parameters as `k_3rd` and it is defined as:

$$k_0(T) = k_0^{300} \times \left(\frac{300\text{K}}{T}\right)^n \quad (5)$$

$$k_{\text{inf}}(T) = k_{\text{inf}}^{300} \times \left(\frac{300\text{K}}{T}\right)^m \quad (6)$$

$$k_{\text{ratio}} = \frac{k_0(T)M}{k_{\text{inf}}(T)} \quad (7)$$

$$N = 0.75 - 1.27 \times \log_{10}(f_c) \quad (8)$$

$$\text{k\_3rd\_iupac} = \frac{k_0(T)M}{1 + k_{\text{ratio}}} \times f_c \left( \frac{1}{1 + (\log_{10}(k_{\text{ratio}})/N)^2} \right) \quad (9)$$

G1002: The path leading to  $2 \text{O}(^3\text{P}) + \text{O}_2$  results in a null cycle regarding odd oxygen and is neglected.

G2110: The rate coefficient is: `k_H02_H02 = (1.5E-12*EXP(19./temp)+1.7E-33*EXP(1000./temp)*cair)*(1.+1.4E-21*EXP(2200./temp)*C(ind_H20))`. The value for the first (pressure-independent) part is from Christensen et al. (2002), the water term from Kircher and Sander (1984).

G3109: The rate coefficient is: `k_N03_N02 = k_3rd(temp,cair,2.E-30,4.4,1.4E-12,0.7,0.6)`.

G3110: The rate coefficient is defined as backward reaction divided by equilibrium constant.



G3203: The rate coefficient is:  $k_{\text{N02\_H02}} = k_{\text{3rd}}(\text{temp}, \text{cair}, 1.8\text{E-}31, 3.2, 4.7\text{E-}12, 1.4, 0.6)$ .

G3206: The rate coefficient is:  $k_{\text{HN03\_OH}} = 2.4\text{E-}14 * \text{EXP}(460./\text{temp}) + 1./ ( 1./ (6.5\text{E-}34 * \text{EXP}(1335./\text{temp})*\text{cair}) + 1./(2.7\text{E-}17 * \text{EXP}(2199./\text{temp})) )$

G3207: The rate coefficient is defined as backward reaction divided by equilibrium constant.

G4103: Sander et al. (2006) recommend a zero product yield for HCHO.

G4107: The rate coefficient is:  $k_{\text{CH3OOH\_OH}} = 3.8\text{E-}12*\text{EXP}(200./\text{temp})$ .

G4109: The same temperature dependence assumed as for CH<sub>3</sub>CHO+NO<sub>3</sub>.

G4201: The product distribution is from von Kuhlmann (2001) (see also Neeb et al. (1998)).

G4206: The rate coefficient was calculated by von Kuhlmann (pers. comm. 2004) using self reactions of CH<sub>3</sub>OO and C<sub>2</sub>H<sub>5</sub>OO from Sander et al. (2003) and geometric mean as suggested by Madronich and Calvert (1990) and Kirchner and Stockwell (1996). The product distribution (branching=0.5/0.25/0.25) is calculated by von Kuhlmann (pers. comm. 2004) based on Villenave and Lesclaux (1996) and Tyndall et al. (2001).

G4207: Same value as for G4107: CH<sub>3</sub>OOH+OH assumed.

G4216: The value 1.0E-11 is from Atkinson et al. (1999), the temperature dependence from Kirchner and Stockwell (1996).

G4218: Same value as for G4107: CH<sub>3</sub>OOH+OH assumed.

G4219: According to Pöschl et al. (2000), the same value as for CH<sub>3</sub>CHO+OH can be assumed.

G4220: This is 50% of the upper limit given by Sander et al. (2003), as suggested by von Kuhlmann (2001).

G4221: The rate coefficient is:  $k_{\text{PAN\_M}} = k_{\text{PA\_N02}}/9.\text{E-}29*\text{EXP}(-14000./\text{temp})$ , i.e. the rate coefficient is defined as backward reaction divided by equilibrium constant.

G4301: The product distribution is for terminal olefin carbons from Zaveri and Peters (1999).

G4304: The rate coefficient is:  $k_{\text{Pr02\_H02}} = 1.9\text{E-}13*\text{EXP}(1300./\text{temp})$ . Value for generic RO<sub>2</sub> + HO<sub>2</sub> reaction from Atkinson (1997) is used.

G4305: The rate coefficient is:  $k_{\text{Pr02\_N0}} = 2.7\text{E-}12*\text{EXP}(360./\text{temp})$ .

G4307: Same value as for G4107: CH<sub>3</sub>OOH+OH assumed.

G4309: The products are from von Kuhlmann (2001).

G4315: Same value as for G4107: CH<sub>3</sub>OOH+OH assumed.

G4319: Same value as for PAN assumed.

G4401: Same value as for propyl group assumed ( $k_{\text{Pr02\_CH302}}$ ).

G4402: Same value as for propyl group assumed ( $k_{\text{Pr02\_H02}}$ ).

G4403: Same value as for propyl group assumed ( $k_{\text{Pr02\_N0}}$ ).

G4404: Same value as for G4107: CH<sub>3</sub>OOH+OH assumed.

G4409: The factor 0.25 was recommended by Uli Poeschl (pers. comm. 2004).

G4414: Same value as for propyl group assumed ( $k_{\text{Pr02\_H02}}$ ).

G4415: Same value as for propyl group assumed ( $k_{\text{Pr02\_N0}}$ ).

G4416: Same value as for G4107: CH<sub>3</sub>OOH+OH assumed.

G4417: Value for C<sub>4</sub>H<sub>9</sub>ONO<sub>2</sub> used here.

G4503: Same temperature dependence assumed as for other RO<sub>2</sub>+HO<sub>2</sub> reactions.

G4504: Yield of 12 % RONO<sub>2</sub> assumed as suggested in Table 2 of Sprengnether et al. (2002).

G6103: The rate coefficient is defined as backward reaction divided by equilibrium constant.

G6402: The initial products are probably HCl and CH<sub>2</sub>OOH (Atkinson et al., 2006). It is assumed that CH<sub>2</sub>OOH dissociates into HCHO and OH.

G6405: Average of reactions with CH<sub>3</sub>Br and CH<sub>3</sub>F from Sander et al. (2006) (B. Steil, pers. comm.).

G6407: Rough extrapolation from reactions with CH<sub>3</sub>CF<sub>3</sub>, CH<sub>3</sub>CClF<sub>2</sub>, and CH<sub>3</sub>CCl<sub>2</sub>F from Sander et al. (2006).

G9400: Addition path. The rate coefficient is:  $k_{\text{DMS\_OH}} = 1.0\text{E-}39*\text{EXP}(5820./\text{temp}) * \text{C}(\text{ind.02}) / (1.+5.0\text{E-}30*\text{EXP}(6280./\text{temp})*\text{C}(\text{ind.02}))$ .



Table 2: Photolysis reactions

| #      | labels  | reaction                                                                                                                                                     | rate coefficient | reference |
|--------|---------|--------------------------------------------------------------------------------------------------------------------------------------------------------------|------------------|-----------|
| J1000  | StTrGJ  | $O_2 + h\nu \rightarrow O(^3P) + O(^3P)$                                                                                                                     | jx(ip_02)        | see note  |
| J1001a | StTrGJ  | $O_3 + h\nu \rightarrow O(^1D)$                                                                                                                              | jx(ip_01D)       | see note  |
| J1001b | StTrGJ  | $O_3 + h\nu \rightarrow O(^3P)$                                                                                                                              | jx(ip_03P)       | see note  |
| J2100  | StGJ    | $H_2O + h\nu \rightarrow H + OH$                                                                                                                             | jx(ip_H2O)       | see note  |
| J2101  | StTrGJ  | $H_2O_2 + h\nu \rightarrow 2 OH$                                                                                                                             | jx(ip_H2O2)      | see note  |
| J3100  | StGNJ   | $N_2O + h\nu \rightarrow O(^1D)$                                                                                                                             | jx(ip_N2O)       | see note  |
| J3101  | StTrGNJ | $NO_2 + h\nu \rightarrow NO + O(^3P)$                                                                                                                        | jx(ip_N02)       | see note  |
| J3102  | StGNJ   | $NO + h\nu \rightarrow N + O(^3P)$                                                                                                                           | jx(ip_N0)        | see note  |
| J3103a | StTrGNJ | $NO_3 + h\nu \rightarrow NO_2 + O(^3P)$                                                                                                                      | jx(ip_N020)      | see note  |
| J3103b | StTrGNJ | $NO_3 + h\nu \rightarrow NO$                                                                                                                                 | jx(ip_N002)      | see note  |
| J3104a | StTrGNJ | $N_2O_5 + h\nu \rightarrow NO_2 + NO_3$                                                                                                                      | jx(ip_N205)      | see note  |
| J3104b | StGNJ   | $N_2O_5 + h\nu \rightarrow NO + O(^3P) + NO_3$                                                                                                               | jx(ip_N03N00)    | see note  |
| J3200  | TrGJ    | $HONO + h\nu \rightarrow NO + OH$                                                                                                                            | jx(ip_HONO)      | see note  |
| J3201  | StTrGNJ | $HNO_3 + h\nu \rightarrow NO_2 + OH$                                                                                                                         | jx(ip_HN03)      | see note  |
| J3202  | StTrGNJ | $HNO_4 + h\nu \rightarrow 0.667 NO_2 + 0.667 HO_2 + 0.333 NO_3 + 0.333 OH$                                                                                   | jx(ip_HN04)      | see note  |
| J4100  | StTrGJ  | $CH_3OOH + h\nu \rightarrow HCHO + OH + HO_2$<br>O isotope transfer: $CH_3OOH \rightarrow OH + HCHO$<br>O isotope transfer: $O_2 \rightarrow HO_2$           | jx(ip_CH300H)    | see note  |
| J4101a | StTrGJ  | $HCHO + h\nu \rightarrow H_2 + CO$                                                                                                                           | jx(ip_COH2)      | see note  |
| J4101b | StTrGJ  | $HCHO + h\nu \rightarrow H + CO + HO_2$<br>O isotope transfer: $HCHO \rightarrow CO$<br>O isotope transfer: $O_2 \rightarrow HO_2$                           | jx(ip_CHOH)      | see note  |
| J4102  | StGJ    | $CO_2 + h\nu \rightarrow CO + O(^3P)$                                                                                                                        | jx(ip_CO2)       | see note  |
| J4103  | StGJ    | $CH_4 + h\nu \rightarrow CO + 0.31 H + 0.69 H_2 + 1.155 H_2O$<br>O isotope transfer: $O_2 \rightarrow CO + H_2O$                                             | jx(ip_CH4)       | see note  |
| J4200  | TrGCJ   | $C_2H_5OOH + h\nu \rightarrow CH_3CHO + HO_2 + OH$<br>O isotope transfer: $C_2H_5OOH \rightarrow CH_3CHO + OH$<br>O isotope transfer: $O_2 \rightarrow HO_2$ | jx(ip_CH300H)    | see note  |
| J4201  | TrGCJ   | $CH_3CHO + h\nu \rightarrow CH_3O_2 + HO_2 + CO$<br>O isotope transfer: $CH_3CHO \rightarrow CO$<br>O isotope transfer: $O_2 \rightarrow CH_3O_2 + HO_2$     | jx(ip_CH3CHO)    | see note  |



Table 2: Photolysis reactions (... continued)

| #     | labels | reaction                                                                                                                                                                                                                                                                                                                                                                                                                                 | rate coefficient                     | reference |
|-------|--------|------------------------------------------------------------------------------------------------------------------------------------------------------------------------------------------------------------------------------------------------------------------------------------------------------------------------------------------------------------------------------------------------------------------------------------------|--------------------------------------|-----------|
| J4202 | TrGCJ  | $\text{CH}_3\text{C}(\text{O})\text{OOH} + h\nu \rightarrow \text{CH}_3\text{O}_2 + \text{OH}$<br>O isotope transfer: $\text{CH}_3\text{C}(\text{O})\text{OOH} \rightarrow \text{OH}$<br>O isotope transfer: $\text{O}_2 \rightarrow \text{CH}_3\text{O}_2$                                                                                                                                                                              | $\text{jx}(\text{ip\_PAA})$          | see note  |
| J4203 | TrGNCJ | $\text{NACA} + h\nu \rightarrow \text{NO}_2 + \text{HCHO} + \text{CO}$                                                                                                                                                                                                                                                                                                                                                                   | $0.19 * \text{jx}(\text{ip\_CHOH})$  | see note  |
| J4204 | TrGNCJ | $\text{PAN} + h\nu \rightarrow 0.6 \text{CH}_3\text{C}(\text{O})\text{OO} + 0.6 \text{NO}_2 + 0.4 \text{CH}_3\text{O}_2 + 0.4 \text{NO}_3 +$<br>$0.4 \text{CO}_2$<br>O isotope transfer: $\text{PAN} \rightarrow \text{CH}_3\text{C}(\text{O})\text{OO} + \text{NO}_2 + \text{NO}_3 + \text{CO}_2$<br>O isotope transfer: $\text{O}_2 \rightarrow \text{CH}_3\text{O}_2$                                                                 | $\text{jx}(\text{ip\_PAN})$          | see note  |
| J4300 | TrGCJ  | $\text{C}_3\text{H}_7\text{OOH} + h\nu \rightarrow \text{CH}_3\text{COCH}_3 + \text{HO}_2 + \text{OH}$<br>O isotope transfer: $\text{C}_3\text{H}_7\text{OOH} \rightarrow \text{CH}_3\text{COCH}_3 + \text{OH}$<br>O isotope transfer: $\text{O}_2 \rightarrow \text{HO}_2$                                                                                                                                                              | $\text{jx}(\text{ip\_CH300H})$       | see note  |
| J4301 | TrGCJ  | $\text{CH}_3\text{COCH}_3 + h\nu \rightarrow \text{CH}_3\text{C}(\text{O})\text{OO} + \text{CH}_3\text{O}_2$<br>O isotope transfer: $\text{CH}_3\text{COCH}_3 \rightarrow 0.333 \text{CH}_3\text{C}(\text{O})\text{OO}$<br>O isotope transfer: $\text{O}_2 \rightarrow 0.667 \text{CH}_3\text{C}(\text{O})\text{OO} + \text{CH}_3\text{O}_2$                                                                                             | $\text{jx}(\text{ip\_CH3COCH3})$     | see note  |
| J4302 | TrGCJ  | $\text{CH}_3\text{COCH}_2\text{OH} + h\nu \rightarrow \text{CH}_3\text{C}(\text{O})\text{OO} + \text{HCHO} + \text{HO}_2$<br>O isotope transfer: $\text{CH}_3\text{COCH}_2\text{OH} \rightarrow 0.333 \text{CH}_3\text{C}(\text{O})\text{OO} + \text{HCHO}$<br>O isotope transfer: $\text{O}_2 \rightarrow 0.667 \text{CH}_3\text{C}(\text{O})\text{OO} + \text{HO}_2$                                                                   | $0.074 * \text{jx}(\text{ip\_CHOH})$ | see note  |
| J4303 | TrGCJ  | $\text{CH}_3\text{COCHO} + h\nu \rightarrow \text{CH}_3\text{C}(\text{O})\text{OO} + \text{CO} + \text{HO}_2$<br>O isotope transfer: $\text{CH}_3\text{COCHO} \rightarrow 0.333 \text{CH}_3\text{C}(\text{O})\text{OO} + \text{CO}$<br>O isotope transfer: $\text{O}_2 \rightarrow 0.667 \text{CH}_3\text{C}(\text{O})\text{OO} + \text{HO}_2$                                                                                           | $\text{jx}(\text{ip\_CH3COCHO})$     | see note  |
| J4304 | TrGCJ  | $\text{CH}_3\text{COCH}_2\text{O}_2\text{H} + h\nu \rightarrow \text{CH}_3\text{C}(\text{O})\text{OO} + \text{HO}_2 + \text{OH}$<br>O isotope transfer: $\text{CH}_3\text{COCH}_2\text{O}_2\text{H} \rightarrow 0.333 \text{CH}_3\text{C}(\text{O})\text{OO} + \text{OH}$<br>O isotope transfer: $\text{O}_2 \rightarrow 0.667 \text{CH}_3\text{C}(\text{O})\text{OO} + \text{HO}_2$                                                     | $\text{jx}(\text{ip\_CH300H})$       | see note  |
| J4305 | TrGNCJ | $\text{MPAN} + h\nu \rightarrow \text{CH}_3\text{COCH}_2\text{OH} + \text{NO}_2$                                                                                                                                                                                                                                                                                                                                                         | $\text{jx}(\text{ip\_PAN})$          | see note  |
| J4306 | TrGNCJ | $\text{C}_3\text{H}_7\text{ONO}_2 + h\nu \rightarrow \text{CH}_3\text{COCH}_3 + \text{NO}_2 + \text{HO}_2$<br>O isotope transfer: $\text{C}_3\text{H}_7\text{ONO}_2 \rightarrow \text{CH}_3\text{COCH}_3 + \text{NO}_2$<br>O isotope transfer: $\text{O}_2 \rightarrow \text{HO}_2$                                                                                                                                                      | $3.7 * \text{jx}(\text{ip\_PAN})$    | see note  |
| J4400 | TrGCJ  | $\text{C}_4\text{H}_9\text{OOH} + h\nu \rightarrow \text{OH} + 0.67 \text{CH}_3\text{COC}_2\text{H}_5 + 0.67 \text{HO}_2 + 0.33$<br>$\text{C}_2\text{H}_5\text{O}_2 + 0.33 \text{CH}_3\text{CHO}$<br>O isotope transfer: $\text{C}_4\text{H}_9\text{OOH} \rightarrow \text{OH} + \text{CH}_3\text{COC}_2\text{H}_5 + \text{CH}_3\text{CHO}$<br>O isotope transfer: $\text{O}_2 \rightarrow \text{HO}_2 + \text{C}_2\text{H}_5\text{O}_2$ | $\text{jx}(\text{ip\_CH300H})$       | see note  |



Table 2: Photolysis reactions (... continued)

| #     | labels   | reaction                                                                                                                                                                                                                                                                                                                                                                                                                                                                                                                                               | rate coefficient                                  | reference |
|-------|----------|--------------------------------------------------------------------------------------------------------------------------------------------------------------------------------------------------------------------------------------------------------------------------------------------------------------------------------------------------------------------------------------------------------------------------------------------------------------------------------------------------------------------------------------------------------|---------------------------------------------------|-----------|
| J4401 | TrGCJ    | MVK + $h\nu \rightarrow \text{CH}_3\text{C}(\text{O})\text{OO} + \text{HCHO} + \text{CO} + \text{HO}_2$<br>O isotope transfer: $\text{MVK} \rightarrow 0.333 \text{CH}_3\text{C}(\text{O})\text{OO} + \text{CO}$<br>O isotope transfer: $\text{O}_2 \rightarrow 0.667 \text{CH}_3\text{C}(\text{O})\text{OO} + \text{HCHO} + \text{HO}_2$                                                                                                                                                                                                              | $0.019 * jx(ip\_COH2) + 0.015 * jx(ip\_CH3COCHO)$ | see note  |
| J4402 | TrGCJ    | MVKOOH + $h\nu \rightarrow \text{OH} + 0.5 \text{CH}_3\text{COCHO} + 0.25 \text{CH}_3\text{COCH}_2\text{OH} + 0.75 \text{HCHO} + 0.75 \text{HO}_2 + 0.25 \text{CH}_3\text{C}(\text{O})\text{OO} + 0.25 \text{CO}$<br>O isotope transfer: $\text{MVKOOH} \rightarrow \text{OH} + \text{CH}_3\text{COCHO} + \text{CH}_3\text{COCH}_2\text{OH} + 0.5 \text{HCHO} + 0.333 \text{CH}_3\text{C}(\text{O})\text{OO} + \text{CO}$<br>O isotope transfer: $\text{O}_2 \rightarrow \text{HO}_2 + 0.5 \text{HCHO} + 0.667 \text{CH}_3\text{C}(\text{O})\text{OO}$ | $jx(ip\_CH3OOH)$                                  | see note  |
| J4403 | TrGCJ    | $\text{CH}_3\text{COC}_2\text{H}_5 + h\nu \rightarrow \text{CH}_3\text{C}(\text{O})\text{OO} + \text{C}_2\text{H}_5\text{O}_2$<br>O isotope transfer: $\text{CH}_3\text{COC}_2\text{H}_5 \rightarrow 0.333 \text{CH}_3\text{C}(\text{O})\text{OO}$<br>O isotope transfer: $\text{O}_2 \rightarrow 0.667 \text{CH}_3\text{C}(\text{O})\text{OO} + \text{C}_2\text{H}_5\text{O}_2$                                                                                                                                                                       | $0.42 * jx(ip\_CHOH)$                             | see note  |
| J4404 | TrGCJ    | MEKOOH + $h\nu \rightarrow \text{CH}_3\text{C}(\text{O})\text{OO} + \text{CH}_3\text{CHO} + \text{OH}$<br>O isotope transfer: $\text{MEKOOH} \rightarrow 0.333 \text{CH}_3\text{C}(\text{O})\text{OO} + \text{CH}_3\text{CHO} + \text{OH}$<br>O isotope transfer: $\text{O}_2 \rightarrow 0.667 \text{CH}_3\text{C}(\text{O})\text{OO}$                                                                                                                                                                                                                | $jx(ip\_CH3OOH)$                                  | see note  |
| J4405 | TrGCJ    | MeCOCO + $h\nu \rightarrow 2 \text{CH}_3\text{C}(\text{O})\text{OO}$<br>O isotope transfer: $\text{MeCOCO} \rightarrow 0.333 \text{CH}_3\text{C}(\text{O})\text{OO}$<br>O isotope transfer: $\text{O}_2 \rightarrow 0.667 \text{CH}_3\text{C}(\text{O})\text{OO}$                                                                                                                                                                                                                                                                                      | $2.15 * jx(ip\_CH3COCHO)$                         | see note  |
| J4406 | TrGNCJ   | ONIT + $h\nu \rightarrow \text{NO}_2 + 0.67 \text{CH}_3\text{COC}_2\text{H}_5 + 0.67 \text{HO}_2 + 0.33 \text{C}_2\text{H}_5\text{O}_2 + 0.33 \text{CH}_3\text{CHO}$<br>O isotope transfer: $\text{ONIT} \rightarrow \text{NO}_2 + \text{CH}_3\text{COC}_2\text{H}_5 + \text{CH}_3\text{CHO}$<br>O isotope transfer: $\text{O}_2 \rightarrow \text{HO}_2 + \text{C}_2\text{H}_5\text{O}_2$                                                                                                                                                             | $3.7 * jx(ip\_PAN)$                               | see note  |
| J4500 | TrGCJ    | ISOOH + $h\nu \rightarrow \text{MVK} + \text{HCHO} + \text{HO}_2 + \text{OH}$<br>O isotope transfer: $\text{ISOOH} \rightarrow \text{MVK} + \text{HCHO} + \text{OH}$<br>O isotope transfer: $\text{O}_2 \rightarrow \text{HO}_2$                                                                                                                                                                                                                                                                                                                       | $jx(ip\_CH3OOH)$                                  | see note  |
| J4501 | TrGNCJ   | ISON + $h\nu \rightarrow \text{MVK} + \text{HCHO} + \text{NO}_2 + \text{HO}_2$<br>O isotope transfer: $\text{ISON} \rightarrow \text{MVK} + \text{HCHO} + \text{NO}_2$<br>O isotope transfer: $\text{O}_2 \rightarrow \text{HO}_2$                                                                                                                                                                                                                                                                                                                     | $3.7 * jx(ip\_PAN)$                               | see note  |
| J6000 | StTrGCIJ | $\text{Cl}_2 + h\nu \rightarrow \text{Cl} + \text{Cl}$                                                                                                                                                                                                                                                                                                                                                                                                                                                                                                 | $jx(ip\_Cl2)$                                     | see note  |
| J6100 | StTrGCIJ | $\text{Cl}_2\text{O}_2 + h\nu \rightarrow 2 \text{Cl}$                                                                                                                                                                                                                                                                                                                                                                                                                                                                                                 | $1.4 * jx(ip\_Cl2O2)$                             | see note  |



Table 2: Photolysis reactions (... continued)

| #      | labels    | reaction                                                                                                                                          | rate coefficient | reference |
|--------|-----------|---------------------------------------------------------------------------------------------------------------------------------------------------|------------------|-----------|
| J6101  | StTrGClJ  | $\text{OCIO} + h\nu \rightarrow \text{ClO} + \text{O}(^3\text{P})$                                                                                | jx(ip_OC10)      | see note  |
| J6200  | StGClJ    | $\text{HCl} + h\nu \rightarrow \text{Cl} + \text{H}$                                                                                              | jx(ip_HCl)       | see note  |
| J6201  | StTrGClJ  | $\text{HOCl} + h\nu \rightarrow \text{OH} + \text{Cl}$                                                                                            | jx(ip_HOCl)      | see note  |
| J6300  | TrGNClJ   | $\text{ClNO}_2 + h\nu \rightarrow \text{Cl} + \text{NO}_2$                                                                                        | jx(ip_ClNO2)     | see note  |
| J6301a | StTrGNClJ | $\text{ClNO}_3 + h\nu \rightarrow \text{Cl} + \text{NO}_3$                                                                                        | jx(ip_ClNO3)     | see note  |
| J6301b | StTrGNClJ | $\text{ClNO}_3 + h\nu \rightarrow \text{ClO} + \text{NO}_2$                                                                                       | jx(ip_ClON02)    | see note  |
| J6400  | StGClJ    | $\text{CH}_3\text{Cl} + h\nu \rightarrow \text{Cl} + \text{CH}_3\text{O}_2$<br>O isotope transfer: $\text{O}_2 \rightarrow \text{CH}_3\text{O}_2$ | jx(ip_CH3Cl)     | see note  |
| J6401  | StGClJ    | $\text{CCl}_4 + h\nu \rightarrow 4 \text{Cl}$                                                                                                     | jx(ip_CCl4)      | see note  |
| J6402  | StGCClJ   | $\text{CH}_3\text{CCl}_3 + h\nu \rightarrow 3 \text{Cl}$                                                                                          | jx(ip_CH3CCl3)   | see note  |
| J6500  | StGFClJ   | $\text{CFCl}_3 + h\nu \rightarrow 3 \text{Cl}$                                                                                                    | jx(ip_CFC13)     | see note  |
| J6501  | StGFClJ   | $\text{CF}_2\text{Cl}_2 + h\nu \rightarrow 2 \text{Cl}$                                                                                           | jx(ip_CF2Cl2)    | see note  |
| J8401a | TrGJ      | $\text{CH}_3\text{I} + h\nu \rightarrow \text{CH}_3\text{O}_2$                                                                                    | JX(ip_CH3I)      | see note  |
| J9002  | StGSJ     | $\text{SF}_6 + h\nu \rightarrow \text{products}$                                                                                                  | JX(ip_SF6)       | see note  |

\*Notes:

J-values are calculated with an external module and then supplied to the MECCA chemistry  
J6100: Stimpfle et al. (2004) claim that the combination of absorption cross sections from Burkholder et al. (1990) and the  $\text{Cl}_2\text{O}_2$  formation rate coefficient by Sander et al. (2003) can approximately reproduce the observed  $\text{Cl}_2\text{O}_2/\text{ClO}$  ratios and ozone depletion. They

give an almost zenith-angle independent ratio of 1.4 for Burkholder et al. (1990) to Sander et al. (2003) J-values. The IUPAC recommendation for the  $\text{Cl}_2\text{O}_2$  formation rate is about 5 to 15 % less than the value by Sander et al. (2003) but more than 20 % larger than the value by Sander et al. (2000). The J-values by Burkholder et al. (1990) are within the uncertainty range of the IUPAC recommendation.



Table 3: Isotope exchange reactions

| #      | labels | reaction                                                                                 | rate coefficient                                | reference                    |
|--------|--------|------------------------------------------------------------------------------------------|-------------------------------------------------|------------------------------|
| IEX001 | StTrG  | $\text{OH} + \text{H}_2\text{O} \rightleftharpoons \text{H}_2\text{O} + \text{OH}$       | $2.3\text{E-}13 \cdot \exp(-2100./\text{temp})$ | Dubey et al. (1997)          |
| IEX002 | StTrG  | $\text{OH} + \text{HO}_2 \rightleftharpoons \text{HO}_2 + \text{OH}$                     | $1.7\text{E-}11 \cdot \exp(+400./\text{temp})$  | Dransfeld and Wagner (1987)  |
| IEX003 | StTrG  | $\text{OH} + \text{NO} \rightleftharpoons \text{NO} + \text{OH}$                         | $1.8\text{E-}11$                                | Greenblatt and Howard (1989) |
| IEX004 | StTrG  | $\text{OH} + \text{NO}_2 \rightleftharpoons \text{NO}_2 + \text{OH}$                     | $1.0\text{E-}11$                                | Greenblatt and Howard (1989) |
| IEX005 | StTrG  | $\text{O}(^3\text{P}) + \text{O}_2 \rightleftharpoons \text{O}_2 + \text{O}(^3\text{P})$ | $2.9\text{E-}12$                                | Anderson et al. (1985)*      |
| IEX006 | StTrG  | $\text{O}(^3\text{P}) + \text{NO} \rightleftharpoons \text{NO} + \text{O}(^3\text{P})$   | $3.7\text{E-}11$                                | Anderson et al. (1985)       |
| IEX007 | StTrG  | $\text{NO} + \text{NO}_2 \rightleftharpoons \text{NO}_2 + \text{NO}$                     | $3.6\text{E-}14$                                | Klein et al. (1963)          |

\*Notes:

IEXO05: Fractionation values for exchange are assigned to those calculated by Johnston et al. (2000).



Table 4: Kinetic isotope effects

| #             | reaction                                                                                                                                         | isotopologue            | fractionation factor $\alpha$ | reference                 |
|---------------|--------------------------------------------------------------------------------------------------------------------------------------------------|-------------------------|-------------------------------|---------------------------|
| <b>G1001</b>  | $\text{O}_2 + \text{O}(^3\text{P}) \rightarrow \text{O}_3$                                                                                       | $^{18}\text{O}_2$       | 1.099                         | Johnston et al. (2000)*   |
|               |                                                                                                                                                  | $^{17}\text{O}_2$       | 1.094                         |                           |
| <b>J1001a</b> | $\text{O}_3 + h\nu \rightarrow \text{O}(^1\text{D})$                                                                                             | $^{18}\text{O}_3$       | 0.978                         | Johnston et al. (2000)    |
|               |                                                                                                                                                  | $^{17}\text{O}_3$       | 0.976                         |                           |
| <b>J1001b</b> | $\text{O}_3 + h\nu \rightarrow \text{O}(^3\text{P})$                                                                                             | $^{18}\text{O}_3$       | 0.978                         | Johnston et al. (2000)    |
|               |                                                                                                                                                  | $^{17}\text{O}_3$       | 0.976                         |                           |
| <b>G4100</b>  | $\text{CH}_4 + \text{O}(^1\text{D}) \rightarrow 0.75 \text{CH}_3\text{O}_2 + 0.75 \text{OH} + 0.25 \text{HCHO} + 0.4 \text{H} + 0.05 \text{H}_2$ | $^{13}\text{CH}_4$      | 1.013                         | Saueressig et al. (2001)* |
|               |                                                                                                                                                  | $^{18}\text{OH}$        | 0.9765                        |                           |
|               |                                                                                                                                                  | $^{18}\text{OH}$        | 0.9876                        |                           |
| <b>G4101</b>  | $\text{CH}_4 + \text{OH} \rightarrow \text{CH}_3\text{O}_2 + \text{H}_2\text{O}$                                                                 | $^{13}\text{CH}_4$      | 1.0039                        | Saueressig et al. (2001)* |
|               |                                                                                                                                                  | $^{18}\text{OH}$        | 0.9765                        |                           |
|               |                                                                                                                                                  | $^{18}\text{OH}$        | 0.9876                        |                           |
| <b>G6400</b>  | $\text{Cl} + \text{CH}_4 \rightarrow \text{HCl} + \text{CH}_3\text{O}_2$                                                                         | $^{13}\text{CH}_4$      | 1.0658                        | Saueressig et al. (1995)* |
| <b>G4110</b>  | $\text{CO} + \text{OH} \rightarrow \text{H} + \text{CO}_2$                                                                                       | $^{13}\text{CO}$        | 1.0065                        | Röckmann et al. (1998)*   |
|               |                                                                                                                                                  | $\text{C}^{18}\text{O}$ | 1.0094                        |                           |
|               |                                                                                                                                                  | $\text{C}^{17}\text{O}$ | 1.0002                        |                           |

\*Notes:

G1001: Yields  $\delta^{18}\text{O}(\text{O}_3) = 90.0\text{‰}$  and  $\delta^{17}\text{O}(\text{O}_3) = 78.0\text{‰}$ , respectively, when combined with J1001a, J1001b and IEX005 reactions kinetic isotope effects.

G4100: Yields  $\delta^{18}\text{O} = 0\text{‰}$  and  $\delta^{18}\text{O} = 0\text{‰}$  in products from  $\text{O}_2$ .

G4101: Same as for G4100.

G4110: Pressure dependent; given is approximate value at 1 bar pressure.

G6400: Temperature dependent; given is approximate value at 298K.



## References

- Abbatt, J. P. D. and Waschewsky, G. C. G.: Heterogeneous interactions of HOBr, HNO<sub>3</sub>, O<sub>3</sub>, and NO<sub>2</sub> with deliquescent NaCl aerosols at room temperature, *J. Phys. Chem. A*, 102, 3719–3725, 1998.
- Anderson, L. C. and Fahey, D. W.: Studies with ClONO<sub>2</sub>: Thermal dissociation rate and catalytic conversion to NO using an NO/O<sub>3</sub> chemiluminescence detector, *J. Phys. Chem.*, 94, 644–652, 1990.
- Anderson, S. M., Klein, F. S., and Kaufman, F.: Kinetics of the isotope exchange reaction of <sup>18</sup>O with NO and O<sub>2</sub> at 298 K, *J. Chem. Phys.*, 83, 1648–1656, 1985.
- Atkinson, R.: Gas-phase tropospheric chemistry of volatile organic compounds: 1. Alkanes and alkenes, *J. Phys. Chem. Ref. Data*, 26, 215–290, 1997.
- Atkinson, R.: Kinetics of the gas-phase reactions of OH radicals with alkanes and cycloalkanes, *Atmos. Chem. Phys.*, 3, 2233–2307, 2003.
- Atkinson, R., Baulch, D. L., Cox, R. A., Hampson, Jr., R. F., Kerr, J. A., Rossi, M. J., and Troe, J.: Summary of evaluated kinetic and photochemical data for atmospheric chemistry: Web version August 1999, <http://www.iupac-kinetic.ch.cam.ac.uk/>, 1999.
- Atkinson, R., Baulch, D. L., Cox, R. A., Crowley, J. N., Hampson, R. F., Hynes, R. G., Jenkin, M. E., Rossi, M. J., and Troe, J.: Evaluated kinetic and photochemical data for atmospheric chemistry: Volume I – gas phase reactions of O<sub>x</sub>, HO<sub>x</sub>, NO<sub>x</sub> and SO<sub>x</sub> species, *Atmos. Chem. Phys.*, 4, 1461–1738, 2004.
- Atkinson, R., Baulch, D. L., Cox, R. A., Crowley, J. N., Hampson, Jr., R. F., Hynes, R. G., Jenkin, M. E., Kerr, J. A., Rossi, M. J., and Troe, J.: Summary of evaluated kinetic and photochemical data for atmospheric chemistry: Web version March 2005, <http://www.iupac-kinetic.ch.cam.ac.uk/>, 2005.
- Atkinson, R., Baulch, D. L., Cox, R. A., Crowley, J. N., Hampson, R. F., Hynes, R. G., Jenkin, M. E., Rossi, M. J., and Troe, J.: Evaluated kinetic and photochemical data for atmospheric chemistry: Volume II – gas phase reactions of organic species, *Atmos. Chem. Phys.*, 6, 3625–4055, 2006.
- Atkinson, R., Baulch, D. L., Cox, R. A., Crowley, J. N., Hampson, R. F., Hynes, R. G., Jenkin, M. E., Rossi, M. J., and Troe, J.: Evaluated kinetic and photochemical data for atmospheric chemistry: Volume III — gas phase reactions of inorganic halogens, *Atmos. Chem. Phys.*, 7, 981–1191, 2007.
- Barone, S. B., Turnipseed, A. A., and Ravishankara, A. R.: Role of adducts in the atmospheric oxidation of dimethyl sulfide, *Faraday Discuss.*, 100, 39–54, 1995.
- Bartlett, W. P. and Margerum, D. W.: Temperature dependencies of the Henry’s law constant and the aqueous phase dissociation constant of bromine chloride, *Environ. Sci. Technol.*, 33, 3410–3414, 1999.
- Boyd, A. A., Flaud, P.-M., Daugey, N., and Lesclaux, R.: Rate constants for RO<sub>2</sub> + HO<sub>2</sub> reactions measured under a large excess of HO<sub>2</sub>, *J. Phys. Chem. A*, 107, 818–821, 2003.
- Brimblecombe, P. and Clegg, S. L.: Erratum, *J. Atmos. Chem.*, 8, 95, 1989.
- Burkholder, J. B., Orlando, J. J., and Howard, C. J.: Ultraviolet absorption cross sections of Cl<sub>2</sub>O<sub>2</sub> between 210 and 410 nm, *J. Phys. Chem.*, 94, 687–695, 1990.
- Canosa-Mas, C. E., King, M. D., Lopez, R., Percival, C. J., Wayne, R. P., Shallcross, D. E., Pyle, J. A., and Daele, V.: Is the reaction between CH<sub>3</sub>(O)O<sub>2</sub> and NO<sub>3</sub> important in the night-time troposphere?, *J. Chem. Soc. Faraday Trans.*, 92, 2211–2222, 1996.
- Chameides, W. L.: The photochemistry of a remote marine stratiform cloud, *J. Geophys. Res.*, 89D, 4739–4755, 1984.
- Christensen, L. E., Okumura, M., Sander, S. P., Salawitch, R. J., Toon, G. C., Sen, B., Blavier, J.-F., and Jucks, K. W.: Kinetics of HO<sub>2</sub> + HO<sub>2</sub> → H<sub>2</sub>O<sub>2</sub> + O<sub>2</sub>: Implications for stratospheric H<sub>2</sub>O<sub>2</sub>, *Geophys. Res. Lett.*, 29, doi:10.1029/2001GL014525, 2002.
- Davis, Jr., W. and de Bruin, H. J.: New activity coefficients of 0–100 per cent aqueous nitric acid, *J. Inorg. Nucl. Chem.*, 26, 1069–1083, 1964.
- De Bruyn, W. J., Shorter, J. A., Davidovits, P., Worsnop, D. R., Zahniser, M. S., and Kolb, C. E.: Uptake of gas-phase sulfur species methanesulfonic acid, dimethylsulfonate, and dimethyl sulfone by aqueous surfaces, *J. Geophys. Res.*, 99D, 16 927–16 932, 1994.
- Deiber, G., George, C., Le Calvé, S., Schweitzer, F., and Mirabel, P.: Uptake study of ClONO<sub>2</sub> and BrONO<sub>2</sub> by halide containing droplets, *Atmos. Chem. Phys.*, 4, 1291–1299, 2004.
- DeMore, W. B., Sander, S. P., Golden, D. M., Hampson, R. F., Kurylo, M. J., Howard, C. J., Ravishankara, A. R., Kolb, C. E., and Molina, M. J.: Chemical kinetics and



- photochemical data for use in stratospheric modeling. Evaluation number 12, JPL Publication 97-4, Jet Propulsion Laboratory, Pasadena, CA, 1997.
- Dillon, T. J., Horowitz, A., Hölscher, D., Crowley, J. N., Vereecken, L., and Peeters, J.: Reaction of HO with hydroxyacetone ( $\text{HOCH}_2\text{C}(\text{O})\text{CH}_3$ ): rate coefficients (233–363 K) and mechanism, *Phys. Chem. Chem. Phys.*, 8, 236–246, 2006.
- Dransfeld, P. and Wagner, H. G.: Comparative study of the reactions of  $^{16}\text{OH}$  and  $^{18}\text{OH}$  with  $\text{H}^{16}\text{O}_2$ , *Z. Naturforsch.*, 42a, 471–476, 1987.
- Dubey, M. K., Mohrschlad, R., Donahue, N. M., and Anderson, J. G.: Isotope specific kinetics of hydroxyl radical (OH) with water ( $\text{H}_2\text{O}$ ): testing models of reactivity and atmosphere fractionation, *J. Phys. Chem.*, 101, 1494–1500, 1997.
- Greenblatt, G. D. and Howard, C. J.: Oxygen atom exchange in the interaction of  $^{18}\text{O}$  with several small molecules, *J. Phys. Chem.*, 93, 1035–1042, 1989.
- Hanson, D. R., Burkholder, J. B., Howard, C. J., and Ravishankara, A. R.: Measurement of OH and  $\text{HO}_2$  radical uptake coefficients on water and sulfuric acid surfaces, *J. Phys. Chem.*, 96, 4979–4985, 1992.
- Hu, J. H., Shi, Q., Davidovits, P., Worsnop, D. R., Zahniser, M. S., and Kolb, C. E.: Reactive uptake of  $\text{Cl}_2(\text{g})$  and  $\text{Br}_2(\text{g})$  by aqueous surfaces as a function of  $\text{Br}^-$  and  $\text{I}^-$  ion concentration: The effect of chemical reaction at the interface, *J. Phys. Chem.*, 99, 8768–8776, 1995.
- Huthwelker, T., Clegg, S. L., Peter, T., Carslaw, K., Luo, B. P., and Brimblecombe, P.: Solubility of  $\text{HOCl}$  in water and aqueous  $\text{H}_2\text{SO}_4$  to stratospheric temperatures, *J. Atmos. Chem.*, 21, 81–95, 1995.
- Hynes, A. J. and Wine, P. H.: The atmospheric chemistry of dimethylsulfoxide (DMSO) kinetics and mechanism of the OH + DMSO reaction, *J. Atmos. Chem.*, 24, 23–37, 1996.
- Jacob, D. J.: Chemistry of OH in remote clouds and its role in the production of formic acid and peroxy monosulfate, *J. Geophys. Res.*, 91D, 9807–9826, 1986.
- Jayne, J. T., Duan, S. X., Davidovits, P., Worsnop, D. R., Zahniser, M. S., and Kolb, C. E.: Uptake of gas-phase alcohol and organic acid molecules by water surfaces, *J. Phys. Chem.*, 95, 6329–6336, 1991.
- Johnston, J. C., Röckmann, T., and Brenninkmeijer, C. A. M.:  $\text{CO}_2 + \text{O}^1\text{D}$  isotopic exchange: Laboratory and modeling studies, *J. Geophys. Res.*, 105, 15 213–15 229, 2000.
- Kircher, C. C. and Sander, S. P.: Kinetics and mechanism of  $\text{HO}_2$  and  $\text{DO}_2$  disproportionations, *J. Phys. Chem.*, 88, 2082–2091, 1984.
- Kirchner, F. and Stockwell, W. R.: Effect of peroxy radical reactions on the predicted concentrations of ozone, nitrogenous compounds, and radicals, *J. Geophys. Res.*, 101D, 21 007–21 022, 1996.
- Klein, F., Spindel, W., and Stern, M. J.: Catalysts of isotopic exchange in nitric oxide, *J. Chim. Phys.*, 60, 148–153, 1963.
- Lax, E.: Taschenbuch für Chemiker und Physiker, Springer Verlag, Berlin, 1969.
- Lee, Y.-N. and Schwartz, S. E.: Reaction kinetics of nitrogen dioxide with liquid water at low partial pressure, *J. Phys. Chem.*, 85, 840–848, 1981.
- Lind, J. A. and Kok, G. L.: Correction to “Henry’s law determinations for aqueous solutions of hydrogen peroxide, methylhydroperoxide, and peroxyacetic acid” by John A. Lind and Gregory L. Kok, *J. Geophys. Res.*, 99D, 21 119, 1994.
- Madronich, S. and Calvert, J. G.: Permutation reactions of organic peroxy radicals in the troposphere, *J. Geophys. Res.*, 95D, 5697–5715, 1990.
- Magi, L., Schweitzer, F., Pallares, C., Cherif, S., , Mirabel, P., and George, C.: Investigation of the uptake rate of ozone and methyl hydroperoxide by water surfaces, *J. Phys. Chem. A*, 101, 4943–4949, 1997.
- McCabe, D. C., Gierczak, T., Talukdar, R. K., and Ravishankara, A. R.: Kinetics of the reaction  $\text{OH} + \text{CO}$  under atmospheric conditions, *Geophys. Res. Lett.*, 28, 3135–3138, 2001.
- Müller, J.-F. and Brasseur, G.: IMAGES: A three-dimensional chemical transport model of the global troposphere, *J. Geophys. Res.*, 100D, 16 445–16 490, 1995.
- Neeb, P., Horie, O., and Moortgat, G. K.: The ethene-ozone reaction in the gas phase, *J. Phys. Chem. A*, 102, 6778–6785, 1998.
- Orlando, J. J., Tyndall, G. S., Bertman, S. B., Chen, W., and Burkholder, J. B.: Rate coefficient for the reaction of OH with  $\text{CH}_2=\text{C}(\text{CH}_3)\text{C}(\text{O})\text{OONO}_2$  (MPAN), *Atmos. Environ.*, 36, 1895–1900, 2002.



- Ponche, J. L., George, C., and Mirabel, P.: Mass transfer at the air/water interface: Mass accommodation coefficients of SO<sub>2</sub>, HNO<sub>3</sub>, NO<sub>2</sub> and NH<sub>3</sub>, *J. Atmos. Chem.*, 16, 1–21, 1993.
- Pöschl, U., Canagaratna, M., Jayne, J. T., Molina, L. T., Worsnop, D. R., Kolb, C. E., and Molina, M. J.: Mass accommodation coefficient of H<sub>2</sub>SO<sub>4</sub> vapor on aqueous sulfuric acid surfaces and gaseous diffusion coefficient of H<sub>2</sub>SO<sub>4</sub> in N<sub>2</sub>/H<sub>2</sub>O, *J. Phys. Chem. A*, 102, 10 082–10 089, 1998.
- Pöschl, U., von Kuhlmann, R., Poisson, N., and Crutzen, P. J.: Development and intercomparison of condensed isoprene oxidation mechanisms for global atmospheric modeling, *J. Atmos. Chem.*, 37, 29–52, 2000.
- Régimbal, J.-M. and Mozurkewich, M.: Peroxynitric acid decay mechanisms and kinetics at low pH, *J. Phys. Chem. A*, 101, 8822–8829, 1997.
- Röckmann, T., Brenninkmeijer, C. A. M., Saueressig, G., Bergamaschi, P., Crowley, J. N., Fischer, H., and Crutzen, P. J.: Mass-independent oxygen isotope fractionation in atmospheric CO as a result of the reaction CO+OH, *Science*, 281, 544–546, 1998.
- Rudich, Y., Talukdar, R. K., Imamura, T., Fox, R. W., and Ravishankara, A. R.: Uptake of NO<sub>3</sub> on KI solutions: Rate coefficient for the NO<sub>3</sub> + I<sup>−</sup> reaction and gas-phase diffusion coefficients for NO<sub>3</sub>, *Chem. Phys. Lett.*, 261, 467–473, 1996.
- Saastad, O. W., Ellermann, T., and Nielsen, C. J.: On the adsorption of NO and NO<sub>2</sub> on cold H<sub>2</sub>O/H<sub>2</sub>SO<sub>4</sub> surfaces, *Geophys. Res. Lett.*, 20, 1191–1193, 1993.
- Sander, S. P., Friedl, R. R., DeMore, W. B., Golden, D. M., Kurylo, M. J., Hampson, R. F., Huie, R. E., Moortgat, G. K., Ravishankara, A. R., Kolb, C. E., and Molina, M. J.: Chemical kinetics and photochemical data for use in stratospheric modeling. Supplement to evaluation 12: Update of key reactions. Evaluation number 13, JPL Publication 00-3, Jet Propulsion Laboratory, Pasadena, CA, <http://jpldataeval.jpl.nasa.gov/>, 2000.
- Sander, S. P., Finlayson-Pitts, B. J., Friedl, R. R., Golden, D. M., Huie, R. E., Kolb, C. E., Kurylo, M. J., Molina, M. J., Moortgat, G. K., Orkin, V. L., and Ravishankara, A. R.: Chemical Kinetics and Photochemical Data for Use in Atmospheric Studies, Evaluation Number 14, JPL Publication 02-25, Jet Propulsion Laboratory, Pasadena, CA, 2003.
- Sander, S. P., Friedl, R. R., Golden, D. M., Kurylo, M. J., Moortgat, G. K., Keller-Rudek, H., Wine, P. H., Ravishankara, A. R., Kolb, C. E., Molina, M. J., Finlayson-Pitts, B. J., Huie, R. E., and Orkin, V. L.: Chemical Kinetics and Photochemical Data for Use in Atmospheric Studies, Evaluation Number 15, JPL Publication 06-2, Jet Propulsion Laboratory, Pasadena, CA, 2006.
- Saueressig, G., Bergamaschi, P., Crowley, J. N., Fischer, H., and Harris, G. W.: Carbon Kinetic Isotope Effect in the Reaction of CH<sub>4</sub> with Cl Atoms, 22, 1225–1228, 1995.
- Saueressig, G., Crowley, J. N., Bergamaschi, P., Bruhl, C., Brenninkmeijer, C. A. M., and Fischer, H.: Carbon 13 and D kinetic isotope effects in the reactions of CH<sub>4</sub> with O<sup>1</sup>D and OH: New laboratory measurements and their implications for the isotopic composition of stratospheric methane, *J. Geophys. Res.*, 106, 23 127–23 138, 2001.
- Schwartz, S. E. and White, W. H.: Solubility equilibria of the nitrogen oxides and oxyacids in dilute aqueous solution, in: *Advances in Environmental Science and Engineering*, edited by Pfafflin, J. R. and Ziegler, E. N., vol. 4, pp. 1–45, Gordon and Breach Science Publishers, NY, 1981.
- Schweitzer, F., Mirabel, P., and George, C.: Uptake of hydrogen halides by water droplets, *J. Phys. Chem. A*, 104, 72–76, 2000.
- Sivakumaran, V., Hölscher, D., Dillon, T. J., and Crowley, J. N.: Reaction between OH and HCHO: temperature dependent rate coefficients (202–399 K) and product pathways (298 K), *Phys. Chem. Chem. Phys.*, 5, 4821–4827, 2003.
- Sprengnether, M., Demerjian, K. L., Donahue, N. M., and Anderson, J. G.: Product analysis of the OH oxidation of isoprene and 1,3-butadiene in the presence of NO, *J. Geophys. Res.*, 107D, doi:10.1029/2001JD000716, 2002.
- Stimpfle, R. M., Wilmouth, D. M., Salawitch, R. J., and Anderson, J. G.: First measurements of ClOOCl in the stratosphere: The coupling of ClOOCl and ClO in the Arctic polar vortex, *J. Geophys. Res.*, 109, doi:10.1029/2003JD003811, 2004.
- Takami, A., Kato, S., Shimono, A., and Koda, S.: Uptake coefficient of OH radical on aqueous surface, *Chem. Phys.*, 231, 215–227, 1998.
- Thomas, K., Volz-Thomas, A., and Kley, D.: Zur Wechselwirkung von NO<sub>3</sub>-Radikalen mit wässrigen Lösungen: Bestimmung des Henry- und des Massenakkommodationskoeffizienten, Ph.D. thesis, Institut für Chemie und



- Dynamik der Geosphäre 2, Forschungszentrum Jülich GmbH, Germany, 1993.
- Thornton, J. and Abbatt, J. P. D.: Measurements of HO<sub>2</sub> uptake to aqueous aerosol: Mass accommodation coefficients and net reactive loss, *J. Geophys. Res.*, 110D, doi: 10.1029/2004JD005402, 2005.
- Tyndall, G. S., Staffelbach, T. A., Orlando, J. J., and Calvert, J. G.: Rate coefficients for the reactions of OH radicals with methylglyoxal and acetaldehyde, *Int. J. Chem. Kinetics*, 27, 1009–1020, 1995.
- Tyndall, G. S., Cox, R. A., Granier, C., Lesclaux, R., Moortgat, G. K., Pilling, M. J., Ravishankara, A. R., and Wallington, T. J.: The atmospheric chemistry of small organic peroxy radicals, *J. Geophys. Res.*, 106D, 12 157–12 182, 2001.
- Villenave, E. and Lesclaux, R.: Kinetics of the cross reactions of CH<sub>3</sub>O<sub>2</sub> and C<sub>2</sub>H<sub>5</sub>O<sub>2</sub> radicals with selected peroxy radicals, *J. Phys. Chem.*, 100, 14 372–14 382, 1996.
- von Kuhlmann, R.: Tropospheric photochemistry of ozone, its precursors and the hydroxyl radical: A 3D-modeling study considering non-methane hydrocarbons, Ph.D. thesis, Johannes Gutenberg-Universität, Mainz, Germany, 2001.
- Wilhelm, E., Battino, R., and Wilcock, R. J.: Low-pressure solubility of gases in liquid water, *Chem. Rev.*, 77, 219–262, 1977.
- Worsnop, D. R., Zahniser, M. S., Kolb, C. E., Gardner, J. A., Watson, L. R., van Doren, J. M., Jayne, J. T., and Davidovits, P.: The temperature dependence of mass accommodation of SO<sub>2</sub> and H<sub>2</sub>O<sub>2</sub> on aqueous surfaces, *J. Phys. Chem.*, 93, 1159–1172, 1989.
- Zaveri, R. A. and Peters, L. K.: A new lumped structure photochemical mechanism for large-scale applications, *J. Geophys. Res.*, 104D, 30 387–30 415, 1999.
